# Supplementary material for: A Series of Green Oxovanadium(IV) Precatalysts with O, N and S Donor Ligands in a Sustainable Olefins Oligomerization Process
Source: MDPI journal article supplement (doi:10.3390/molecules27228038), 2022-11-19
Supplement: s1 [file s1]

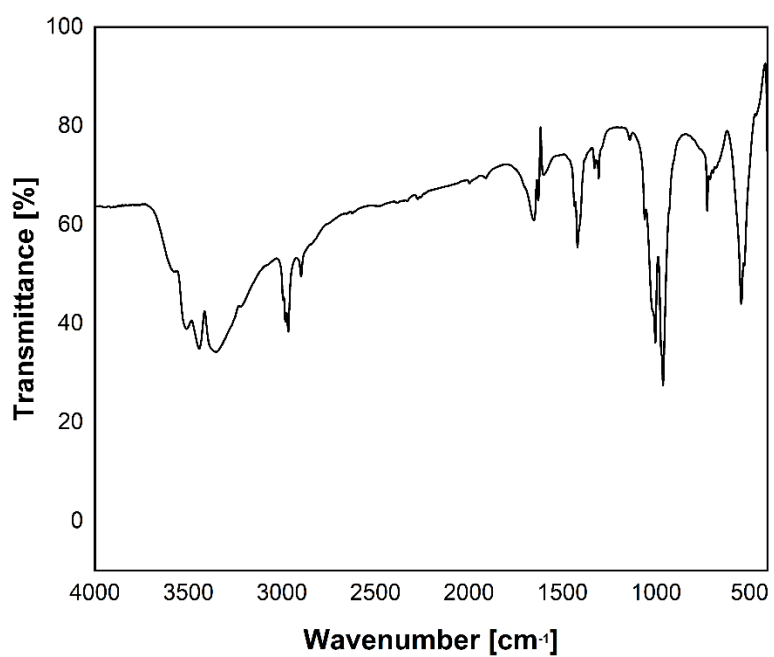

Figure S1. The results of FTIR spectroscopy for the products of oligomerization 3-buten-2-ol obtained using  $[\text{VO}(\text{TDA})(\text{phen})] \cdot 1.5 \text{ H}_2\text{O}$ .

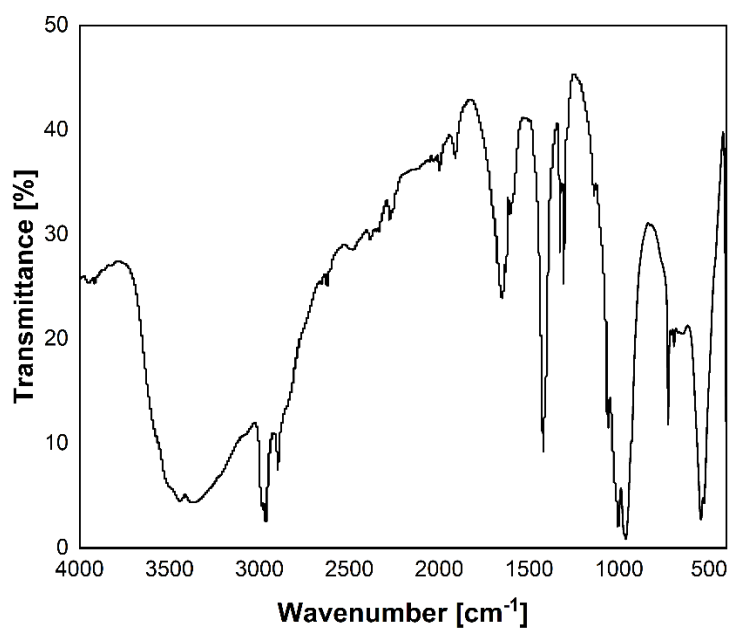

Figure S2. The results of FTIR spectroscopy for the products of oligomerization 3-buten-2-ol obtained using [VOO(dipic)(2-phepyH)] • H<sub>2</sub>O.

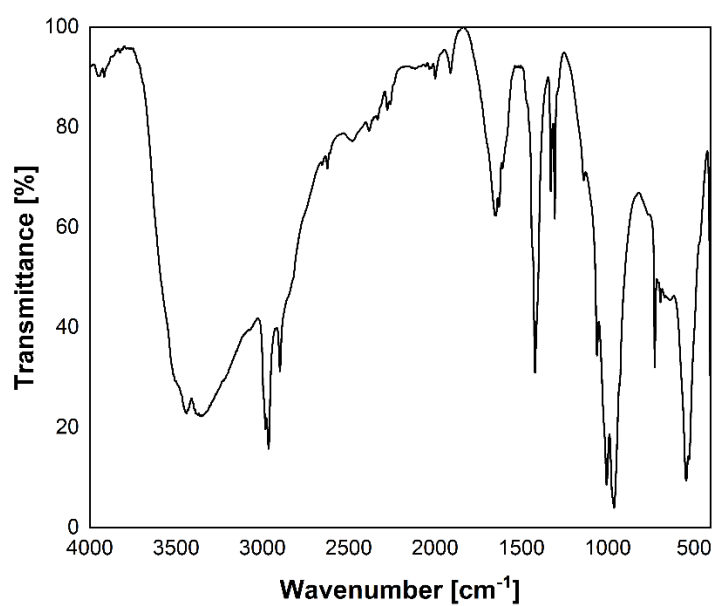

Figure S3. The results of FTIR spectroscopy for the products of oligomerization 3-buten-2-ol obtained using [VO(dipic)(dmbipy)] • 2 H<sub>2</sub>O.

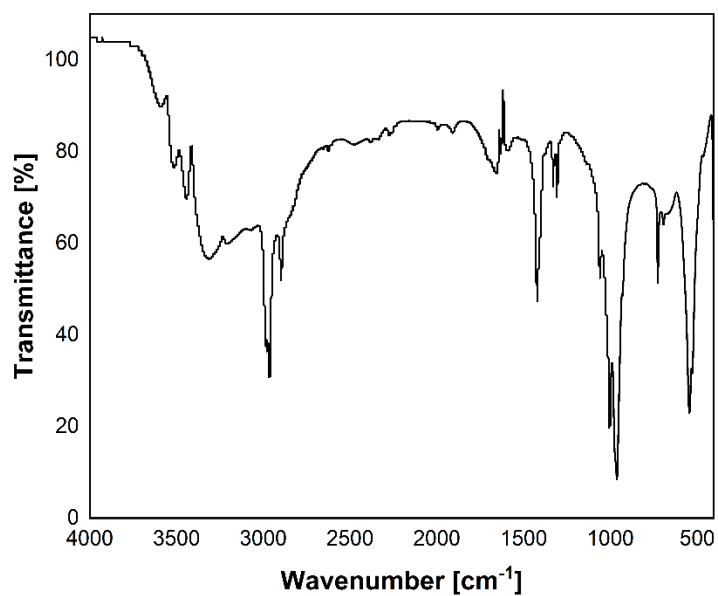

Figure S4. The results of FTIR spectroscopy for the products of oligomerization 3-buten-2-ol obtained using  $[\text{VO}(\text{ODA})\text{bipy}] \cdot 2 \text{H}_2\text{O}$ .

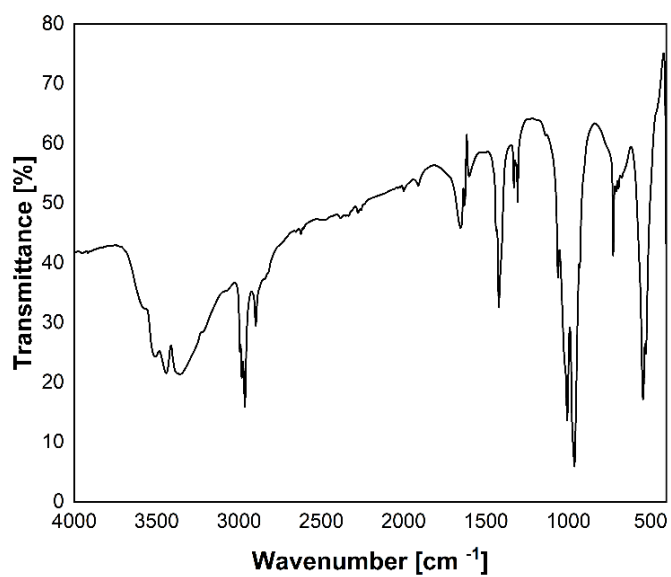

Figure S5. The results of FTIR spectroscopy for the products of oligomerization allyl alcohol obtained using  $[\text{VO}(\text{TDA})(\text{phen})] \cdot 1.5 \text{H}_2\text{O}$ .

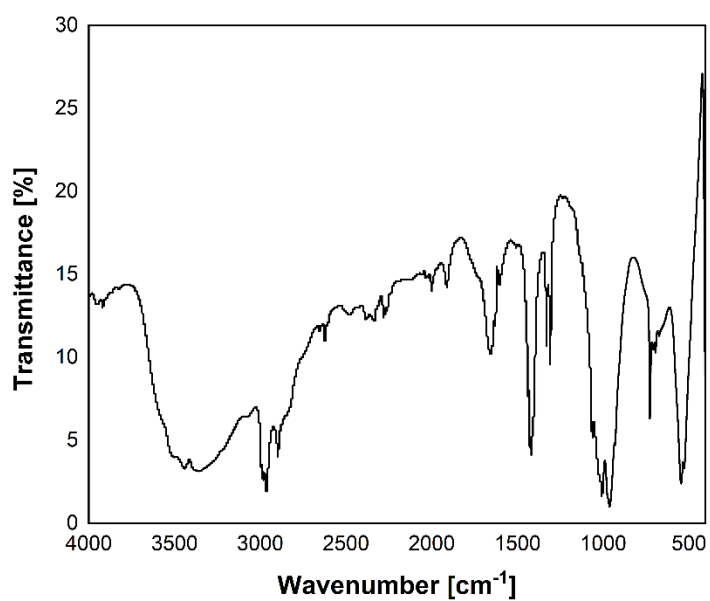

Figure S6. The results of FTIR spectroscopy for the products of oligomerization allyl alcohol obtained using [VOO(dipic)(2-phepyH)] • H<sub>2</sub>O.

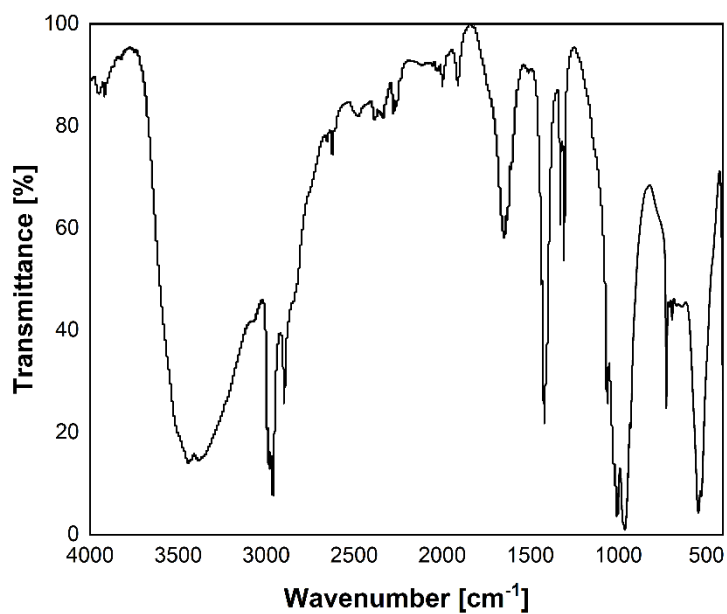

Figure S7. The results of FTIR spectroscopy for the products of oligomerization allyl alcohol obtained using [VO(dipic)(dmbipy)] • 2 H<sub>2</sub>O.

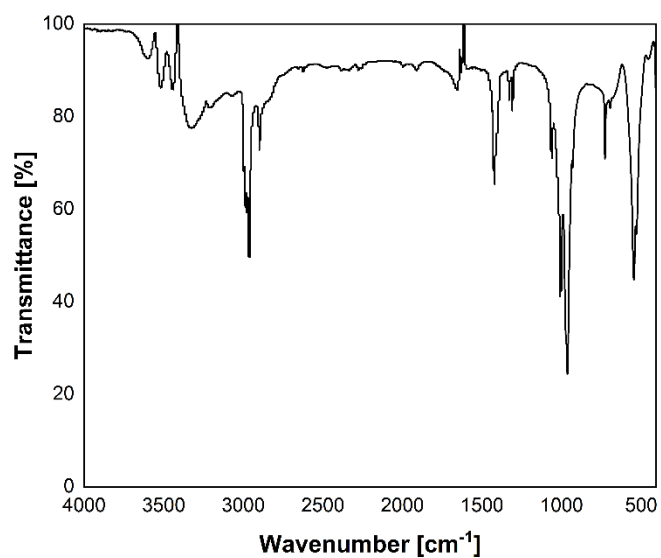

Figure S8. The results of FTIR spectroscopy for the products of oligomerization allyl alcohol obtained using  $[\text{VO}(\text{ODA})\text{bipy}] \cdot 2 \text{H}_2\text{O}$ .

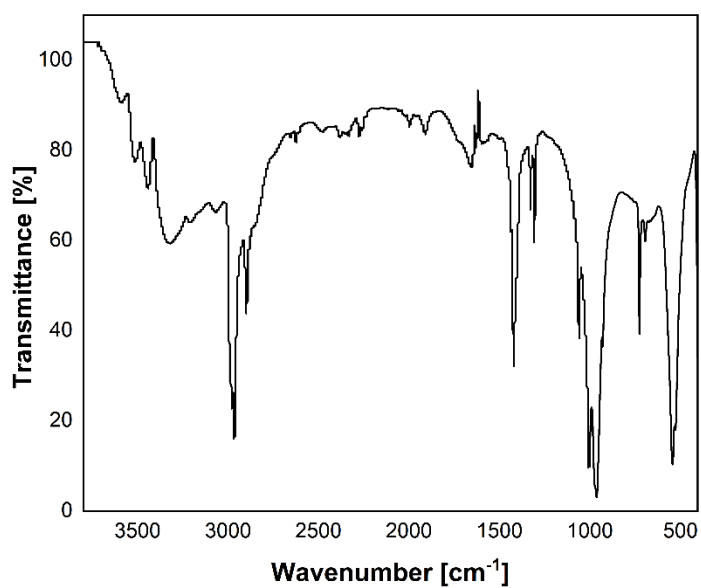

Figure S9. The results of FTIR spectroscopy for the products of oligomerization 2,3-dibromo-2-propen-1-ol obtained using  $[\text{VO}(\text{TDA})(\text{phen})] \cdot 1.5 \text{H}_2\text{O}$ .

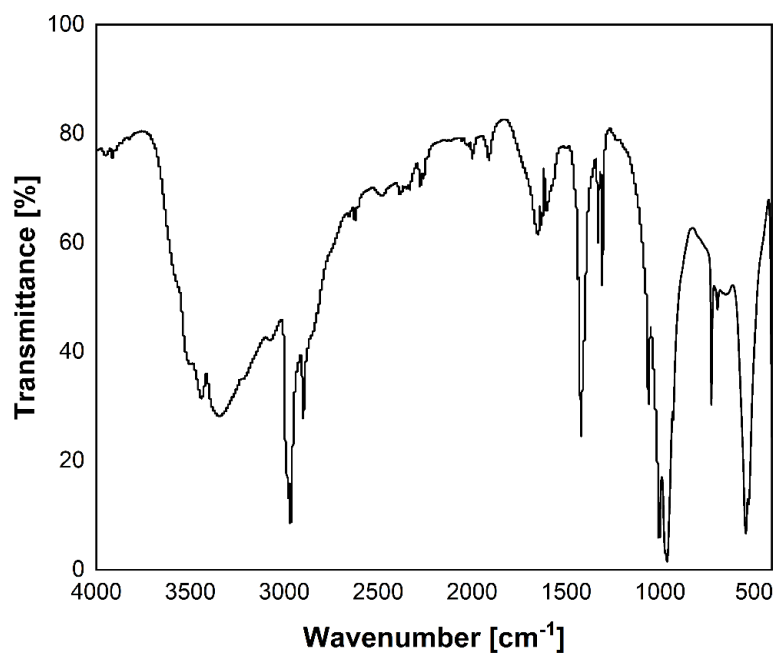

Figure S10. The results of FTIR spectroscopy for the products of oligomerization 2,3-dibromo-2-propen-1-ol obtained using  $[\text{VOO}(\text{dipic})(2\text{-phepyH})] \cdot \text{H}_2\text{O}$ .

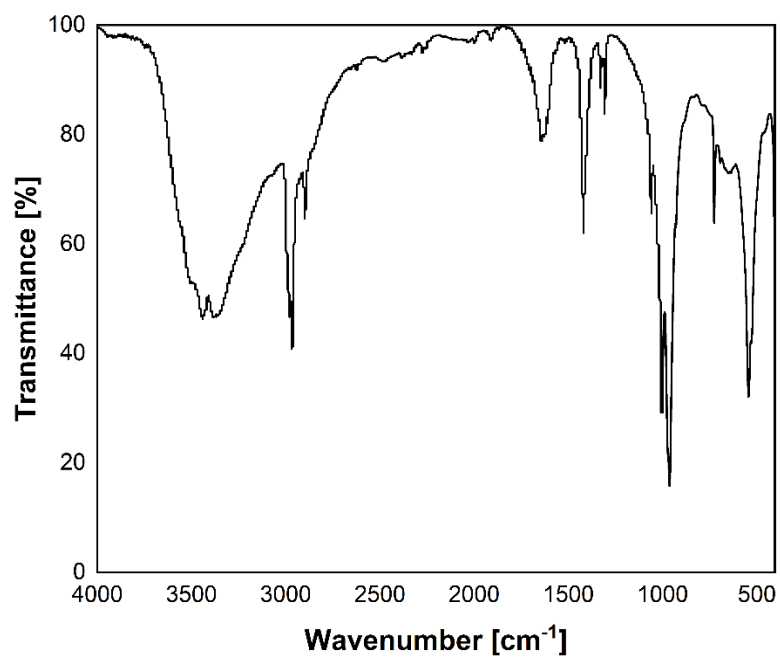

Figure S11. The results of FTIR spectroscopy for the products of oligomerization 2,3-dibromo-2-propen-1-ol obtained using  $[\text{VO}(\text{dipic})(\text{dmbipy})] \cdot 2 \text{H}_2\text{O}$ .

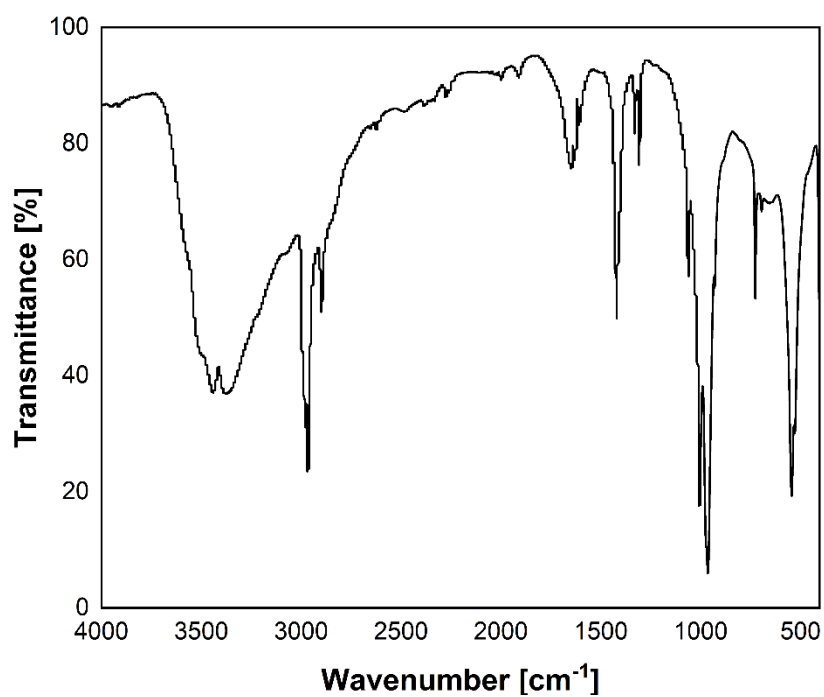

Figure S12. The results of FTIR spectroscopy for the products of oligomerization 2,3-dibromo-2-propen-1-ol obtained using  $[\text{VO}(\text{ODA})\text{bipy}] \cdot 2 \text{H}_2\text{O}$ .

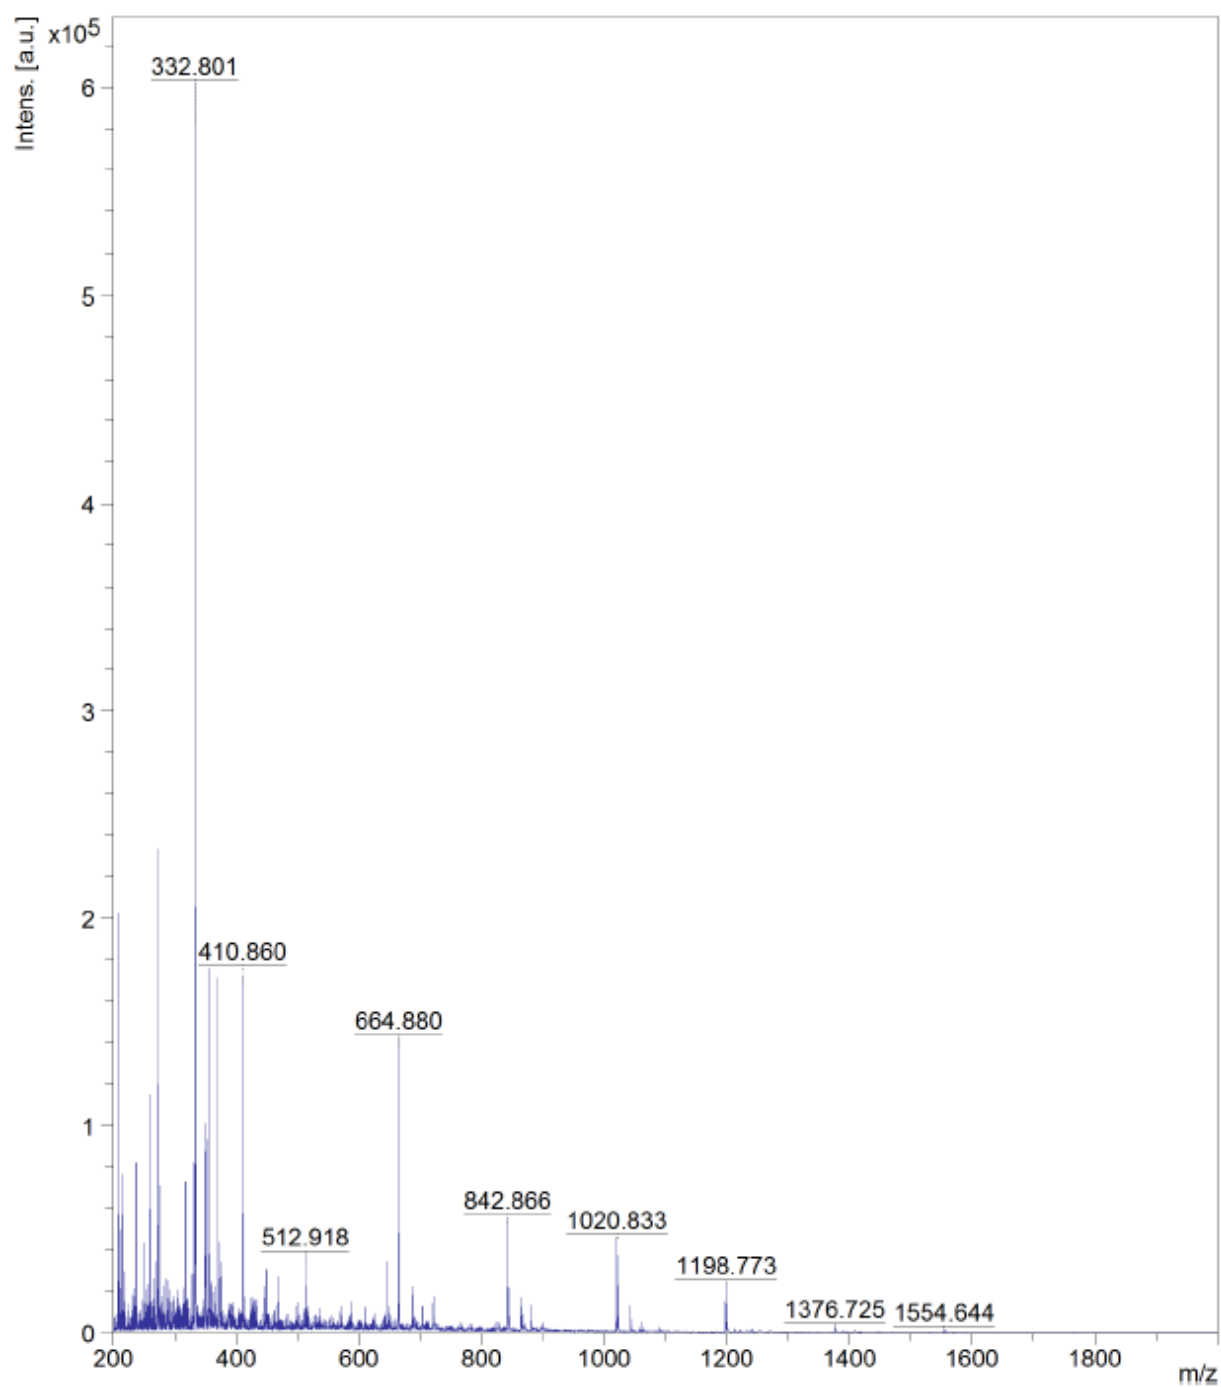

Figure S13. The MALDI-TOF-MS spectrum of the 3-buten-2-ol oligomer obtained using [VO(TDA)(phen)] • 1.5 H<sub>2</sub>O.

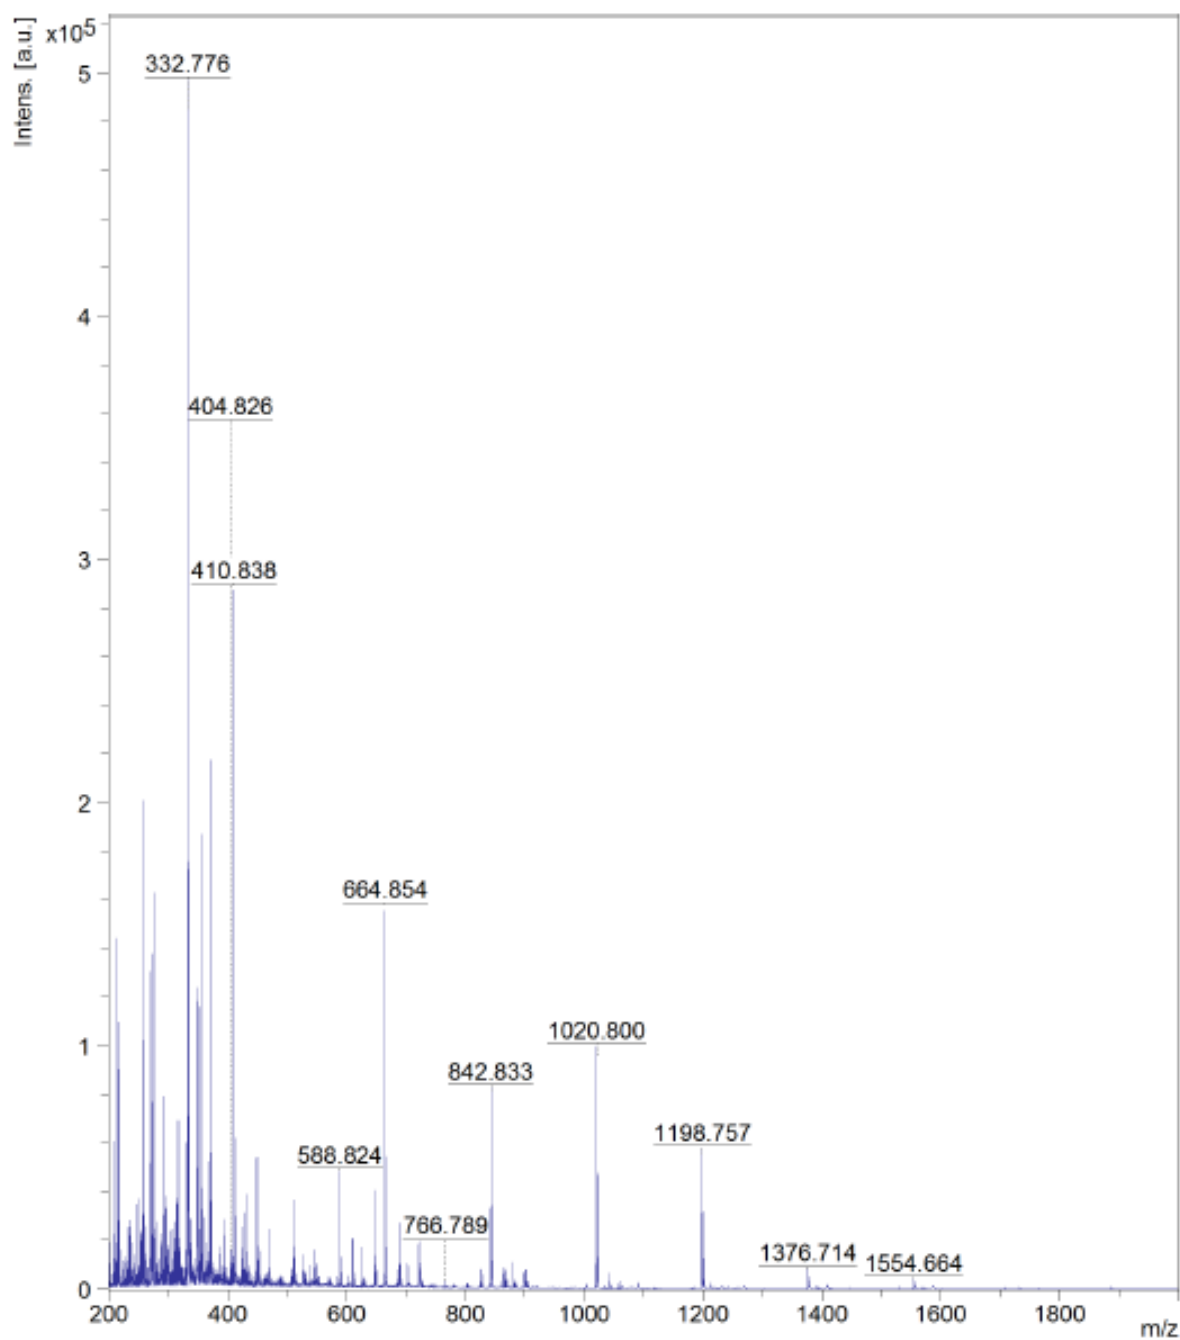

Figure S14. The MALDI-TOF-MS spectrum of the allyl alcohol oligomer obtained using  $[\text{VO}(\text{TDA})(\text{phen})] \cdot 1.5 \text{ H}_2\text{O}$ .

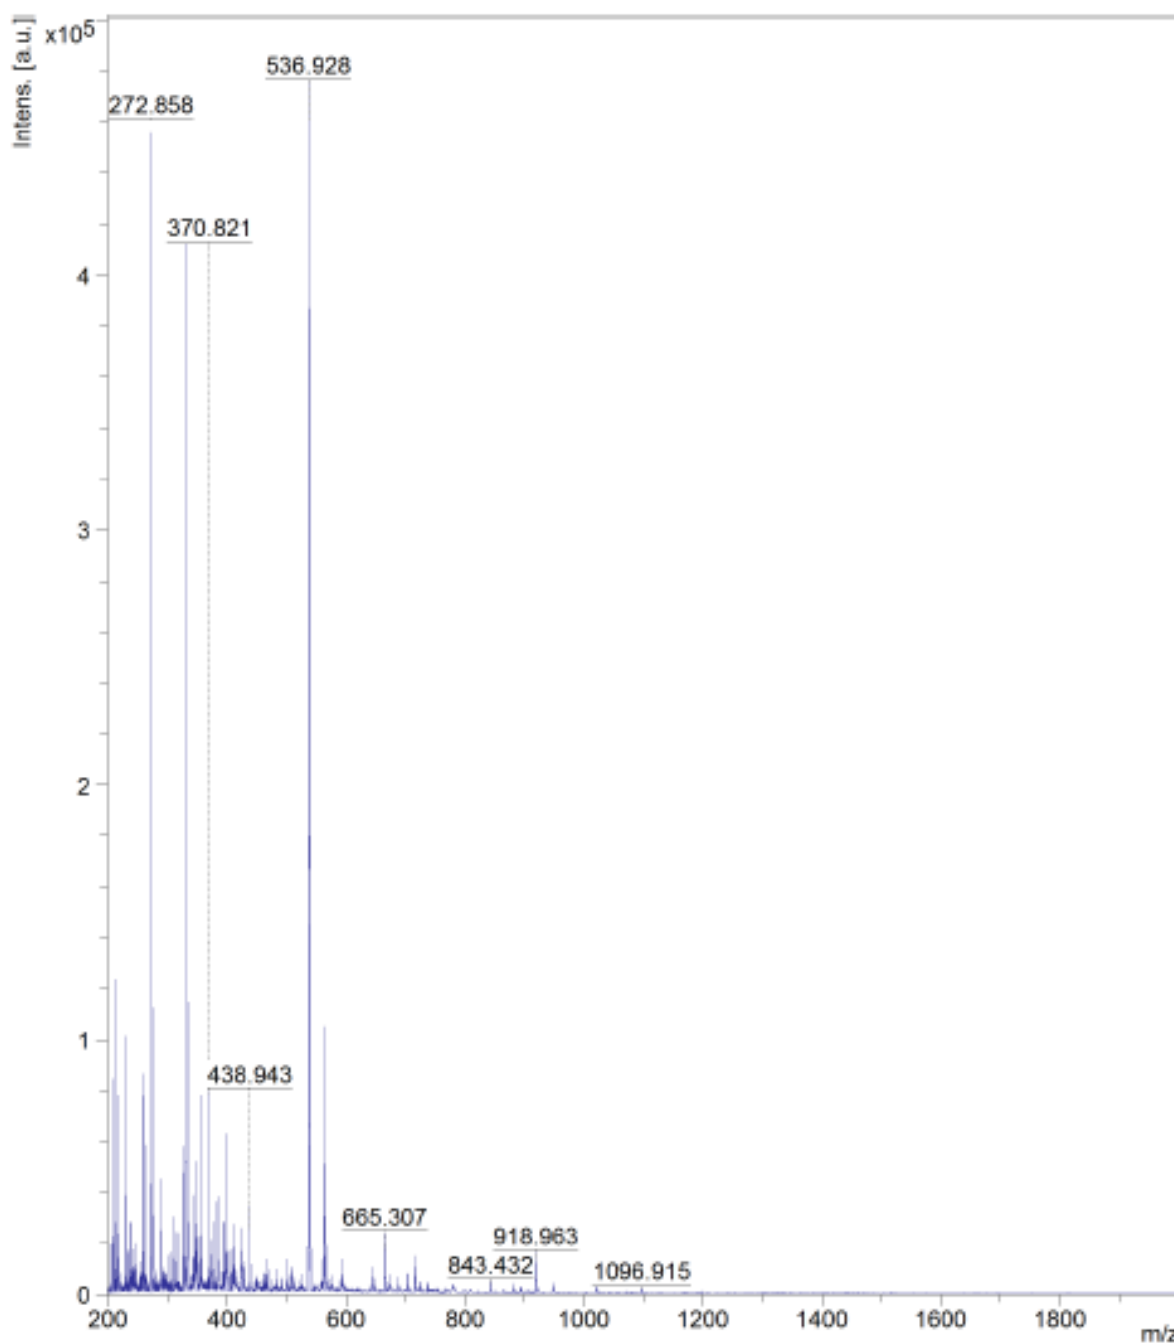

Figure S15. The MALDI-TOF-MS spectrum of the 2,3-dibromo-2-propen-1-ol oligomer obtained using  $[\text{VO}(\text{TDA})(\text{phen})] \cdot 1.5 \text{ H}_2\text{O}$ .

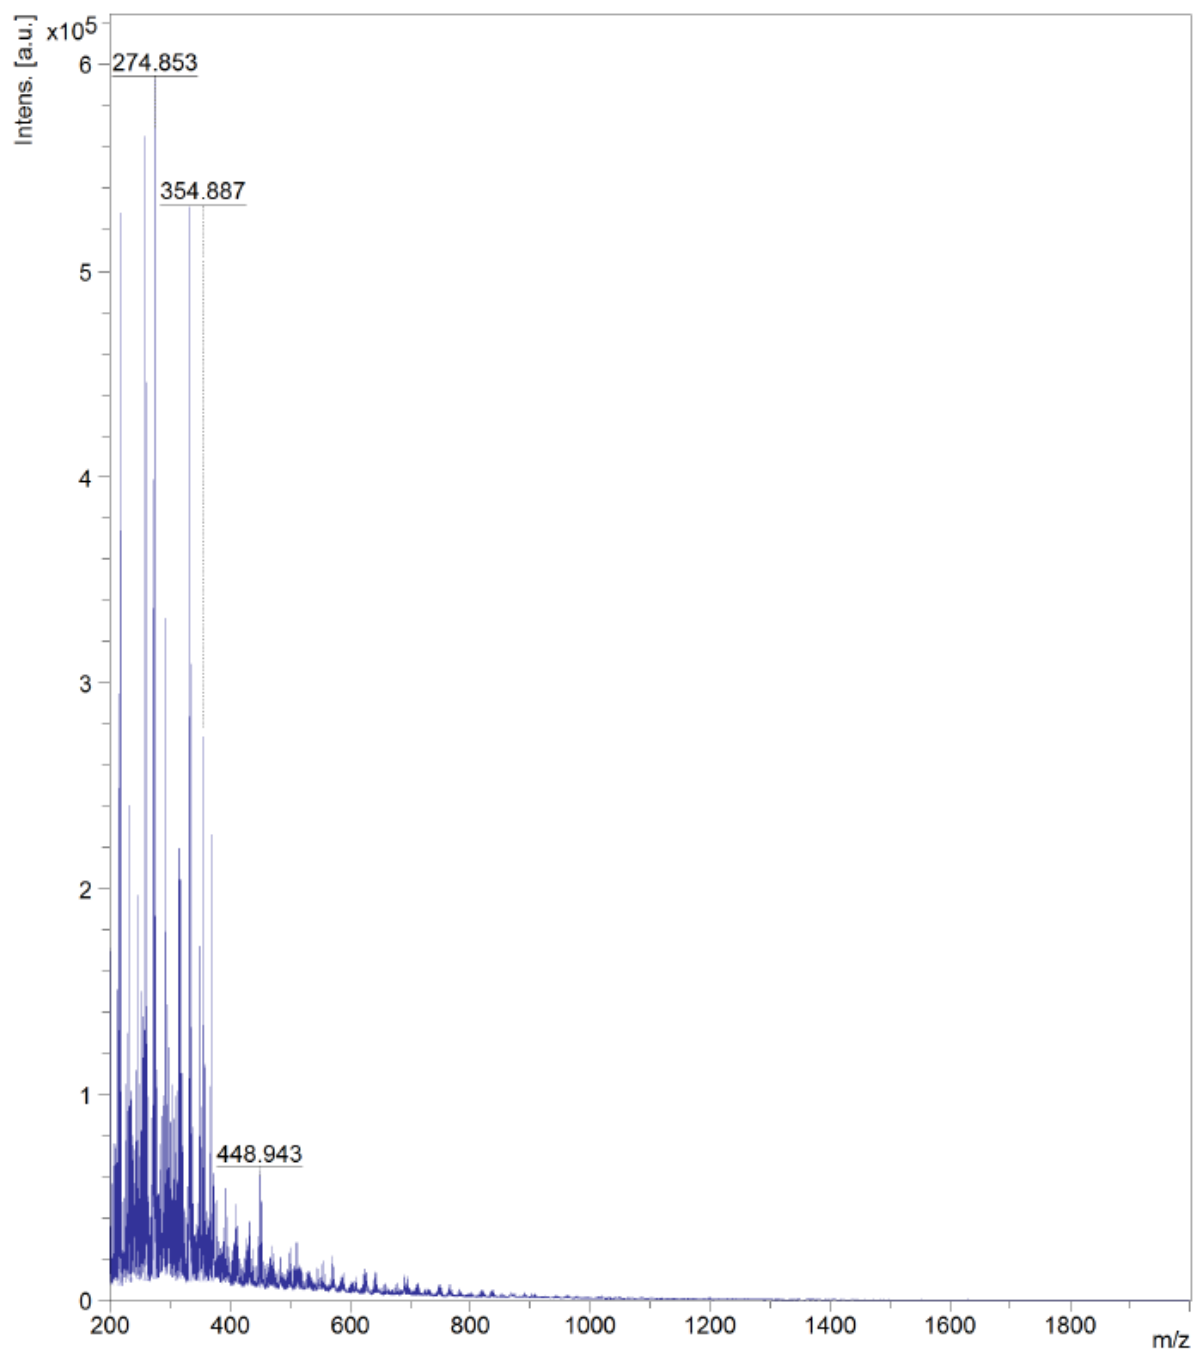

Figure S16. The MALDI-TOF-MS spectrum of the 3-buten-2-ol oligomer obtained using [VOO(dipic)(2-phepyH)]  $\cdot$  H<sub>2</sub>O.

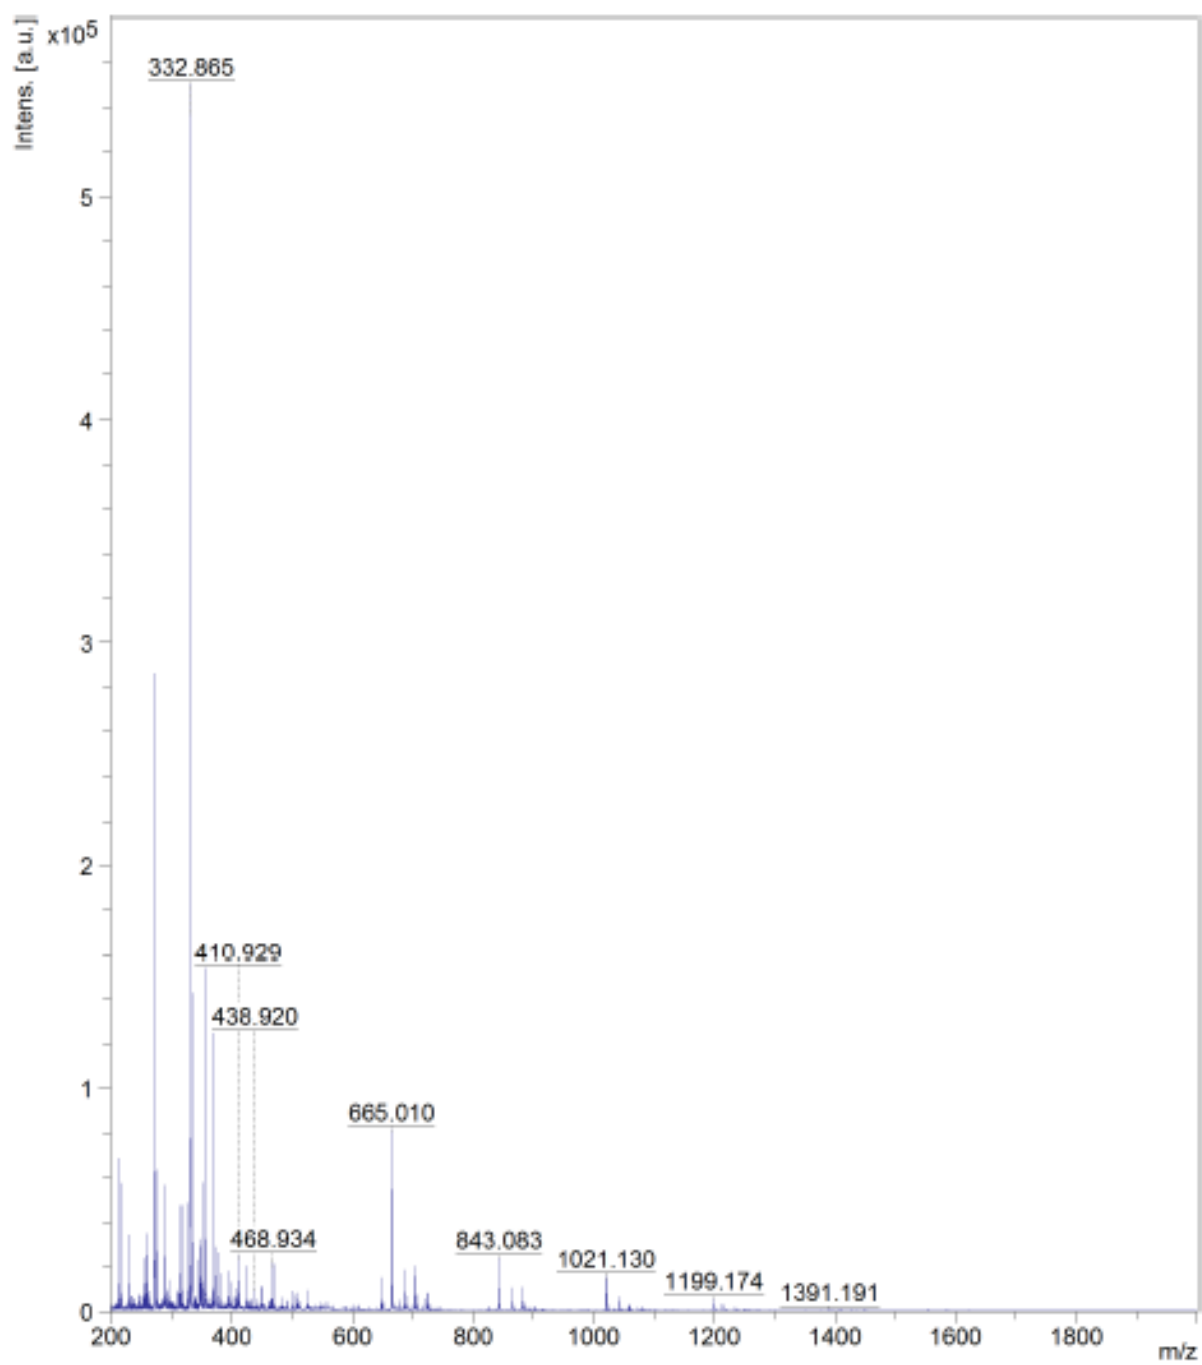

Figure S17. The MALDI-TOF-MS spectrum of the allyl alcohol oligomer obtained using [VOO(dipic)(2-phepyH)] • H<sub>2</sub>O.

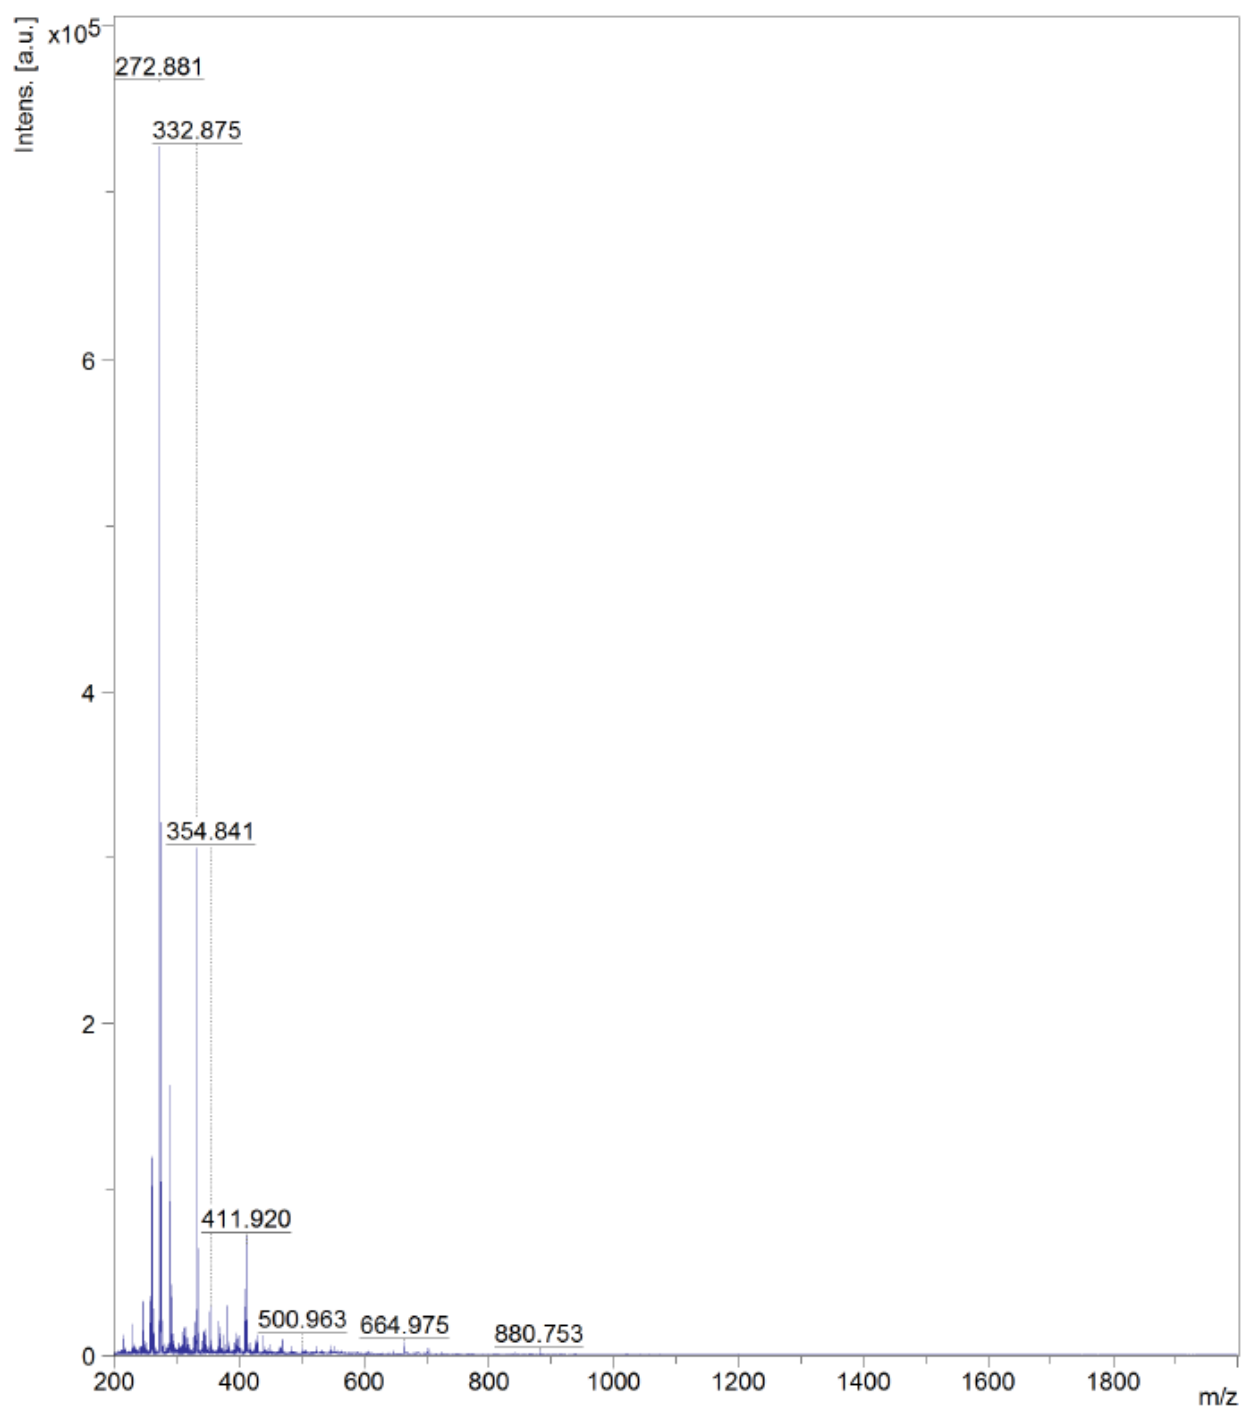

Figure S18. The MALDI-TOF-MS spectrum of the 2,3-dibromo-2-propen-1-ol oligomer obtained using [VOO(dipic)(2-phepyH)]  $\cdot$  H<sub>2</sub>O.

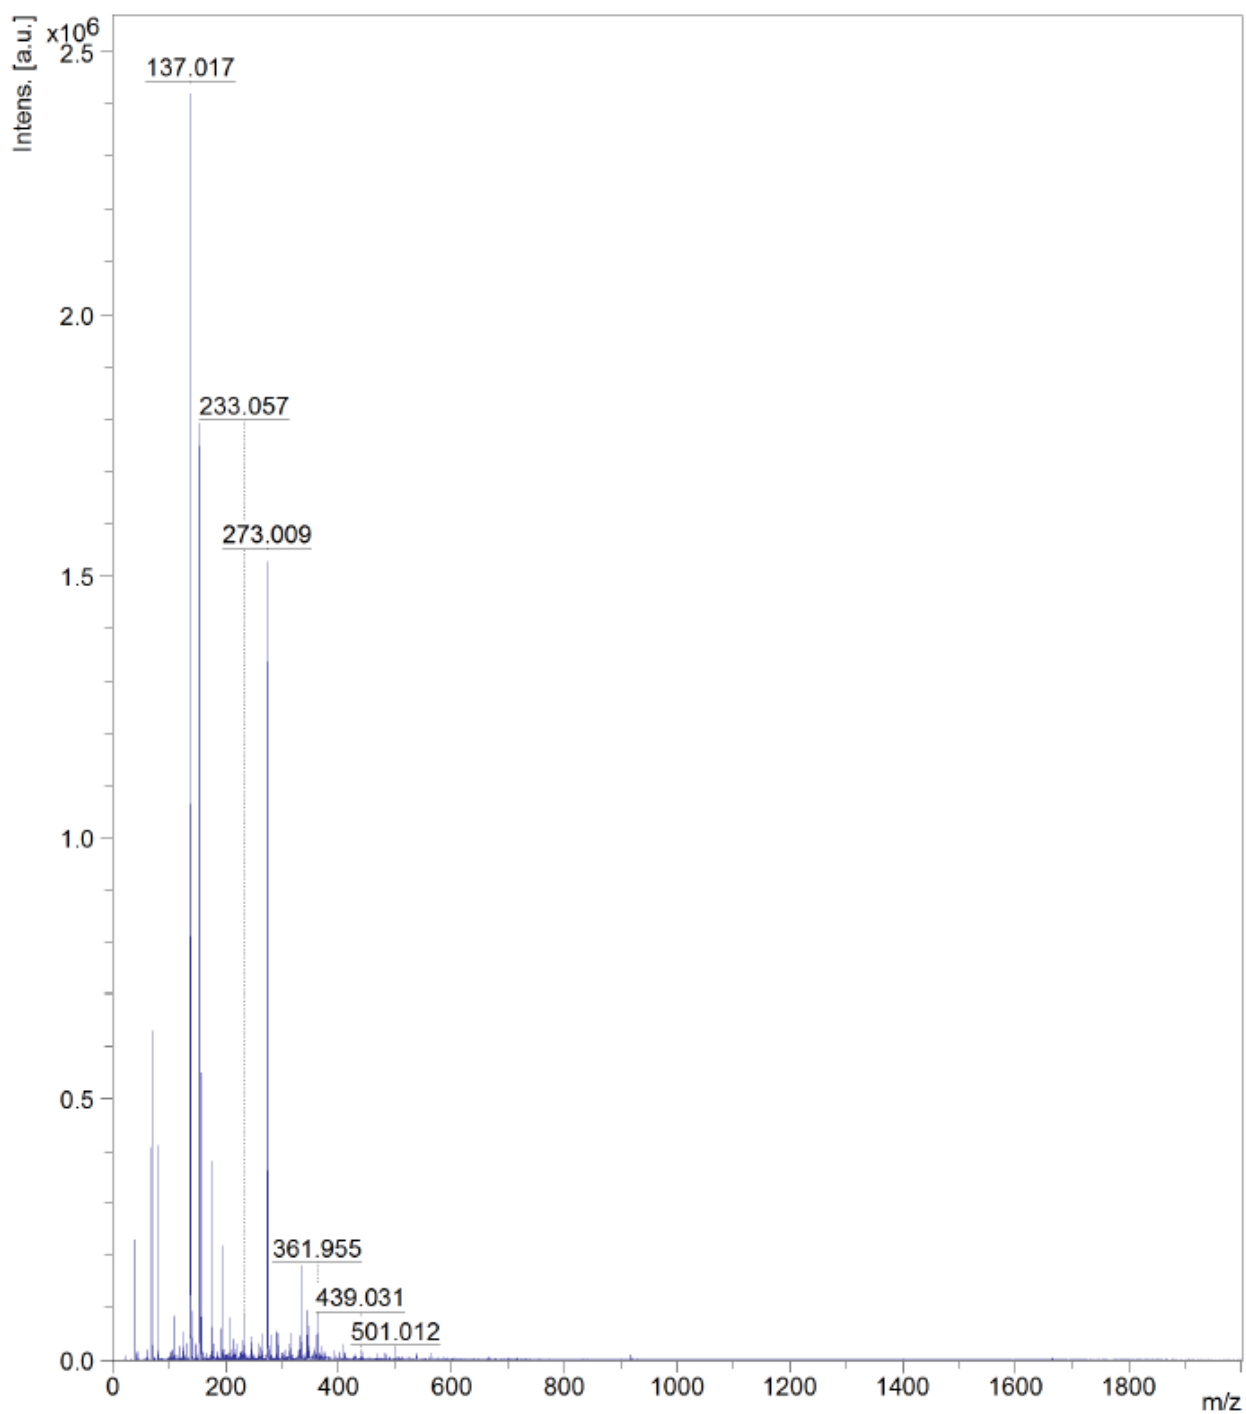

Figure S19. The MALDI-TOF-MS spectrum of the 3-buten-2-ol oligomer obtained using  $[\text{VO}(\text{dipic})(\text{dmbipy})] \cdot 2 \text{H}_2\text{O}$ .

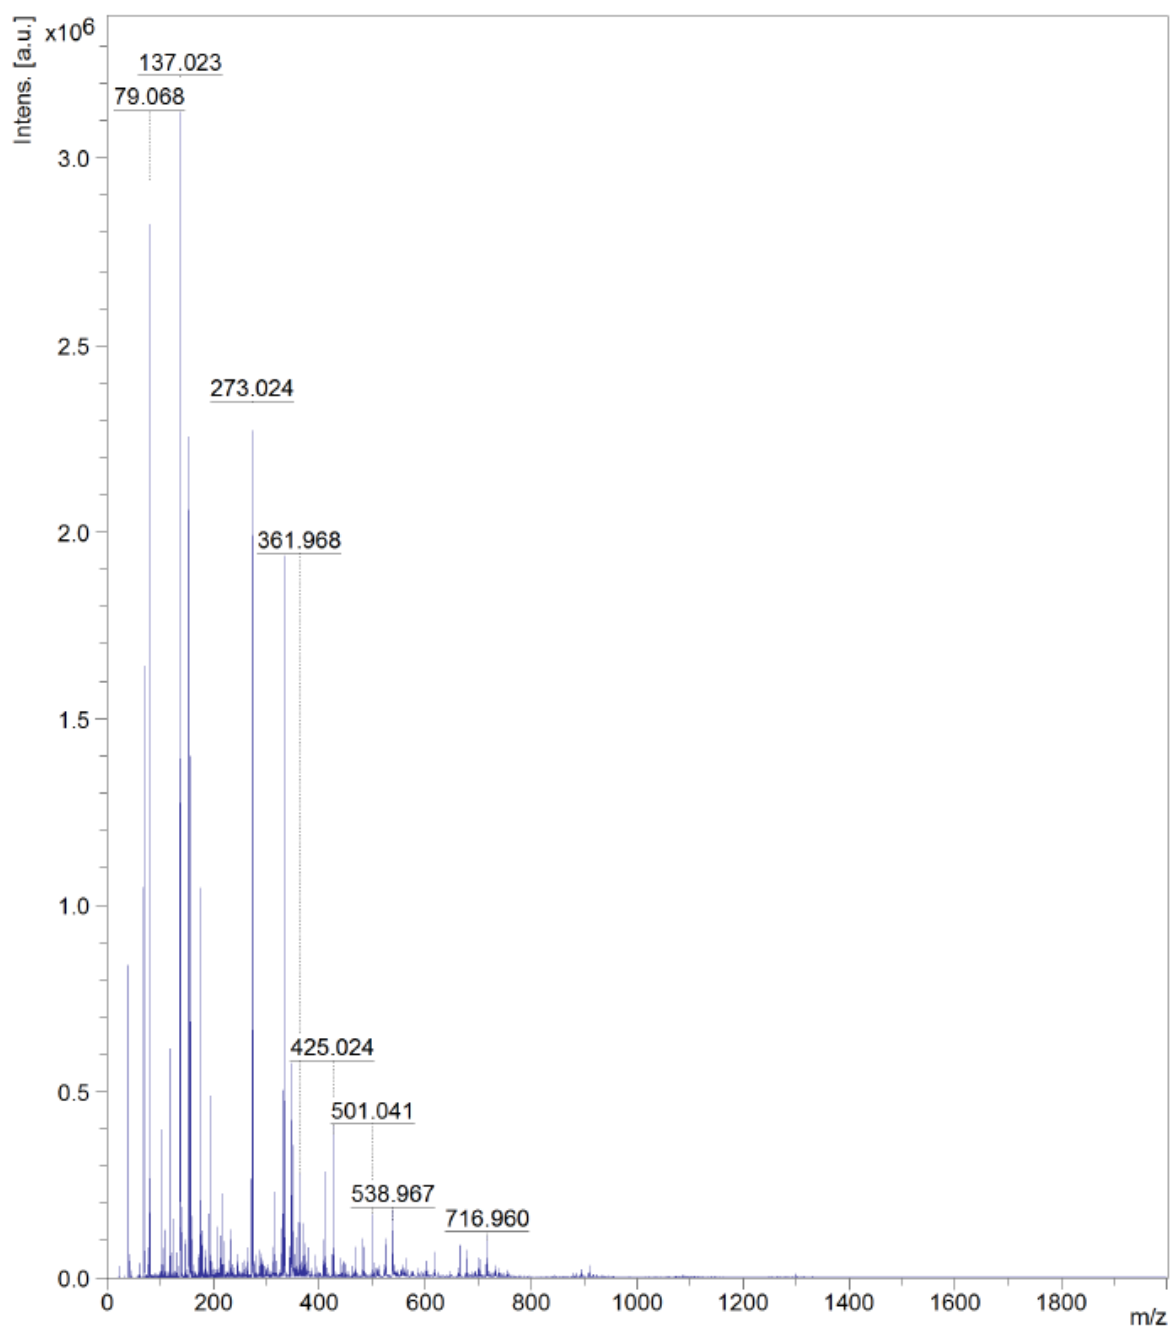

Figure S20. The MALDI-TOF-MS spectrum of the allyl alcohol oligomer obtained using  $[\text{VO}(\text{dipic})(\text{dmbipy})] \cdot 2 \text{H}_2\text{O}$ .

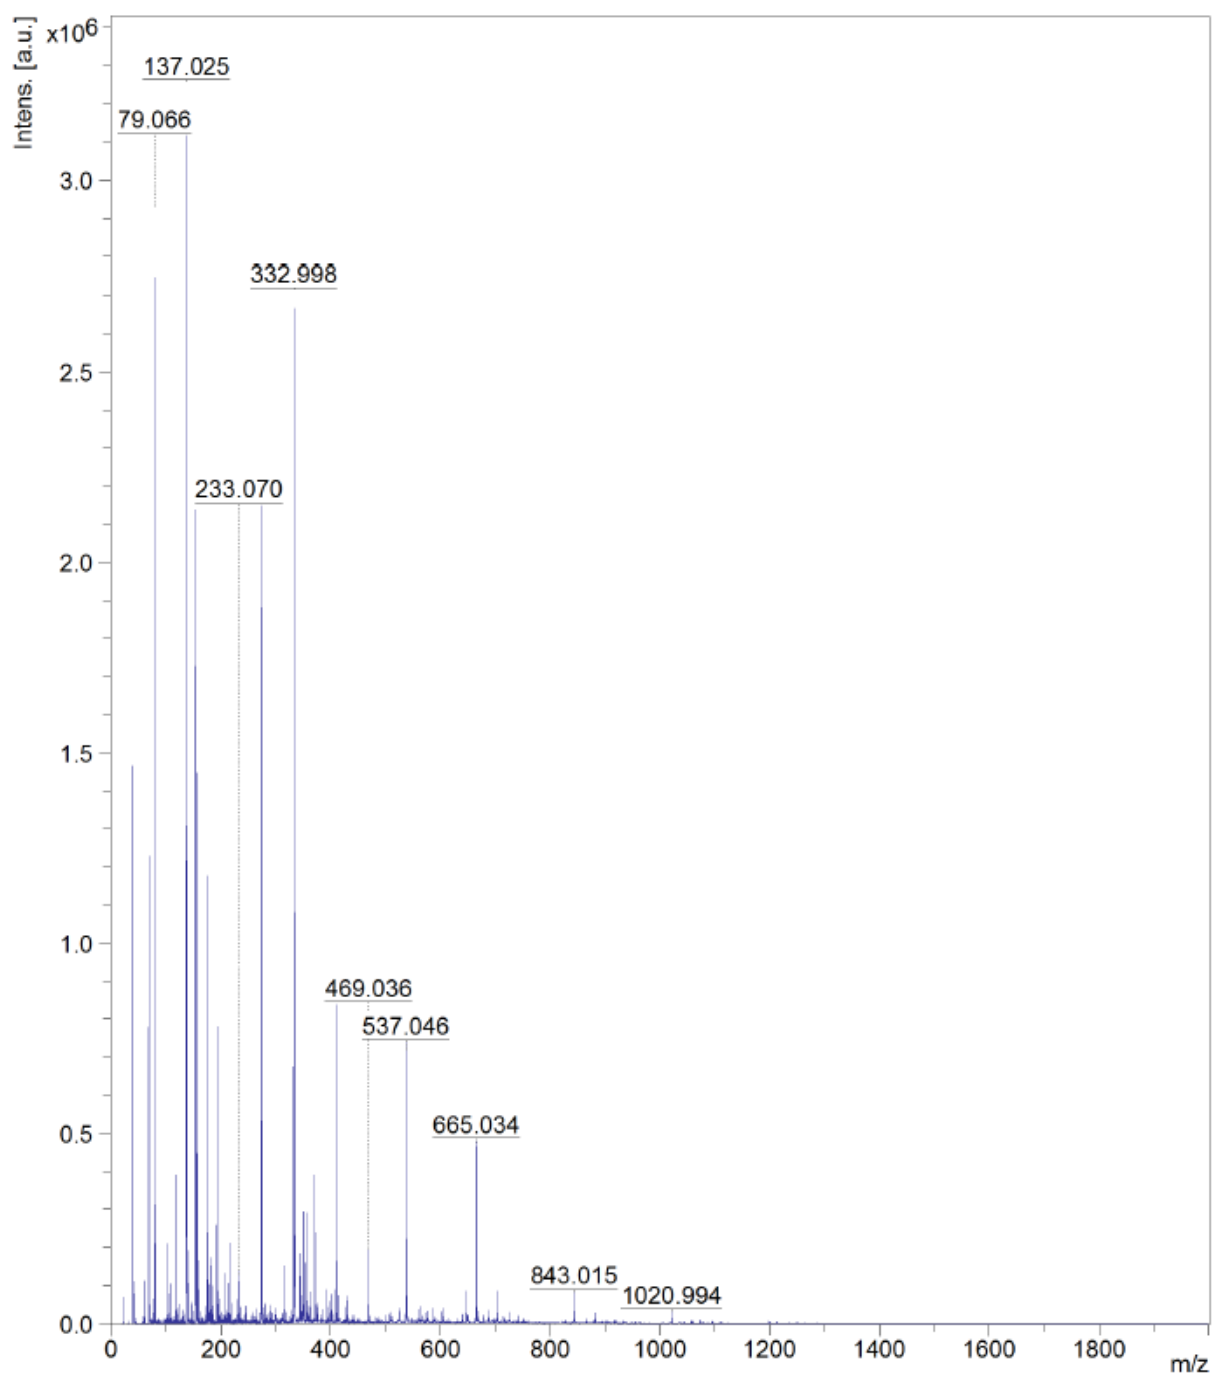

Figure S21. The MALDI-TOF-MS spectrum of the 2,3-dibromo-2-propen-1-ol oligomer obtained using  $[\text{VO}(\text{dipic})(\text{dmbipy})] \cdot 2 \text{H}_2\text{O}$ .

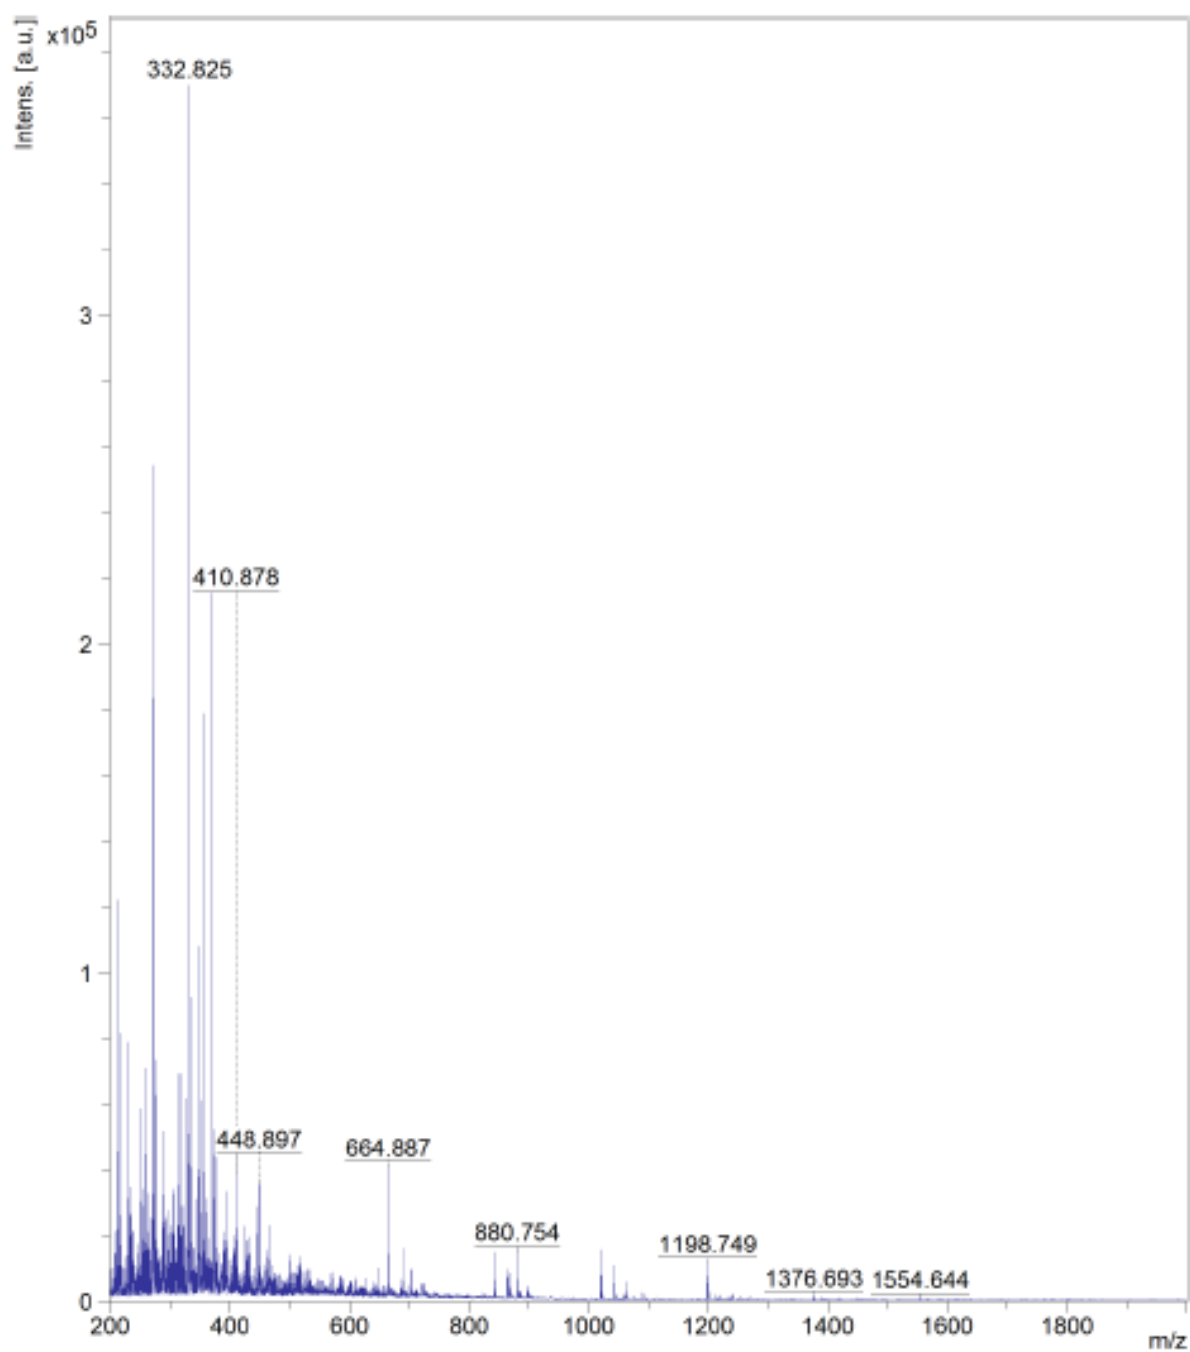

Figure S22. The MALDI-TOF-MS spectrum of the 3-buten-2-ol oligomer obtained using  $[\text{VO}(\text{ODA})\text{bipy}] \cdot 2 \text{H}_2\text{O}$ .

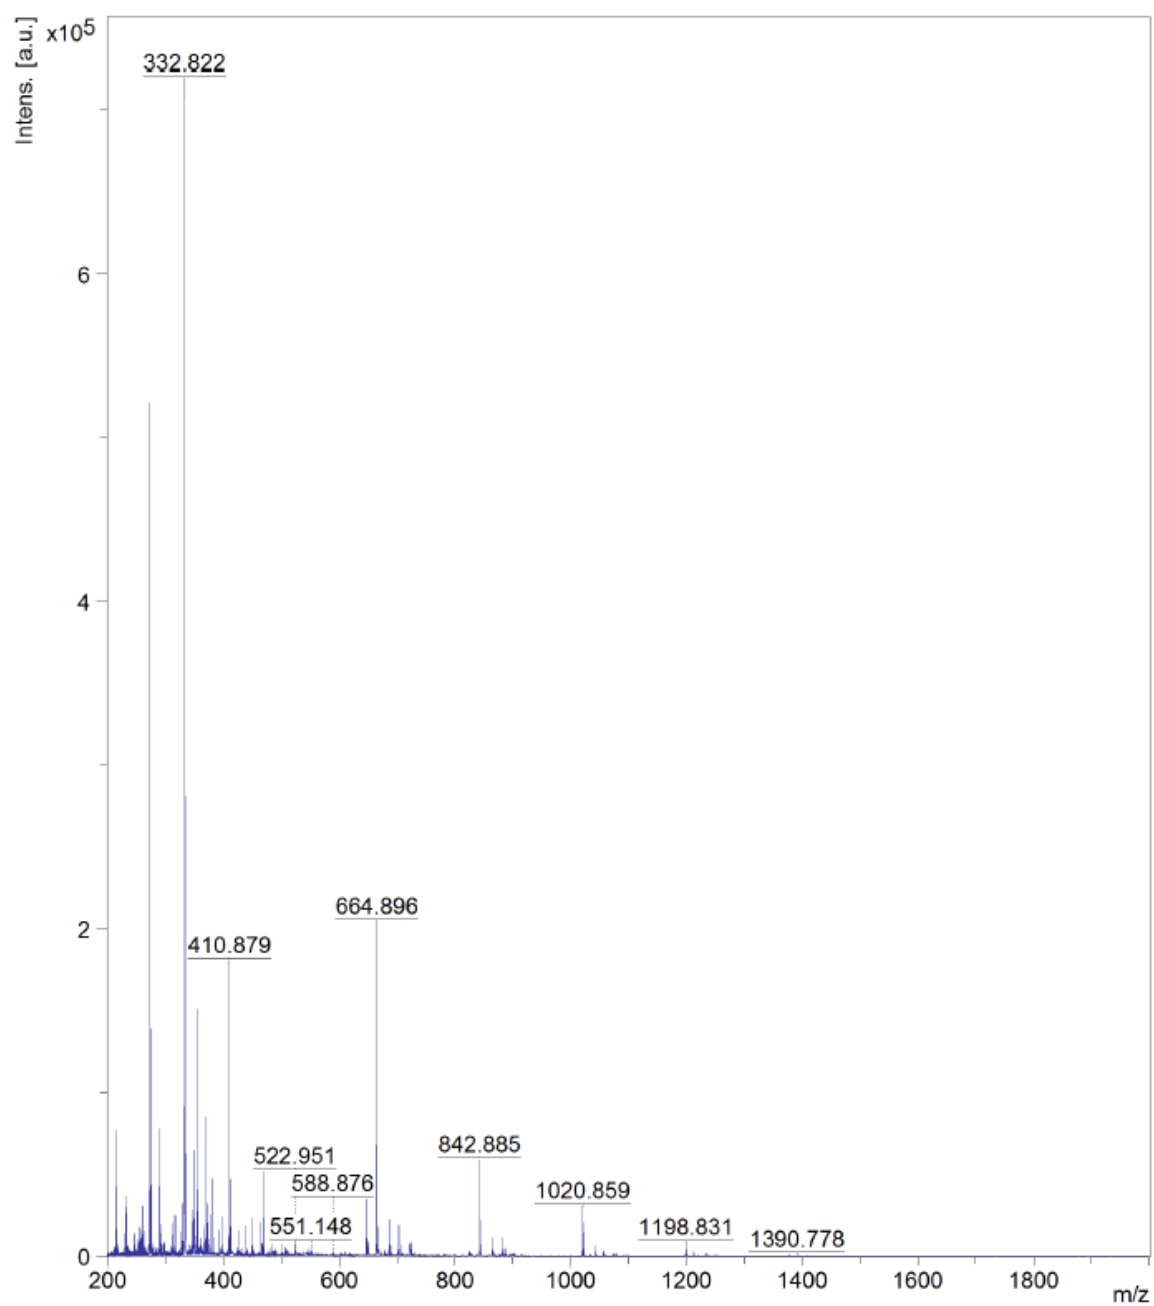

Figure S23. The MALDI-TOF-MS spectrum of the allyl alcohol oligomer obtained using  $[\text{VO}(\text{ODA})\text{bipy}] \cdot 2 \text{H}_2\text{O}$ .

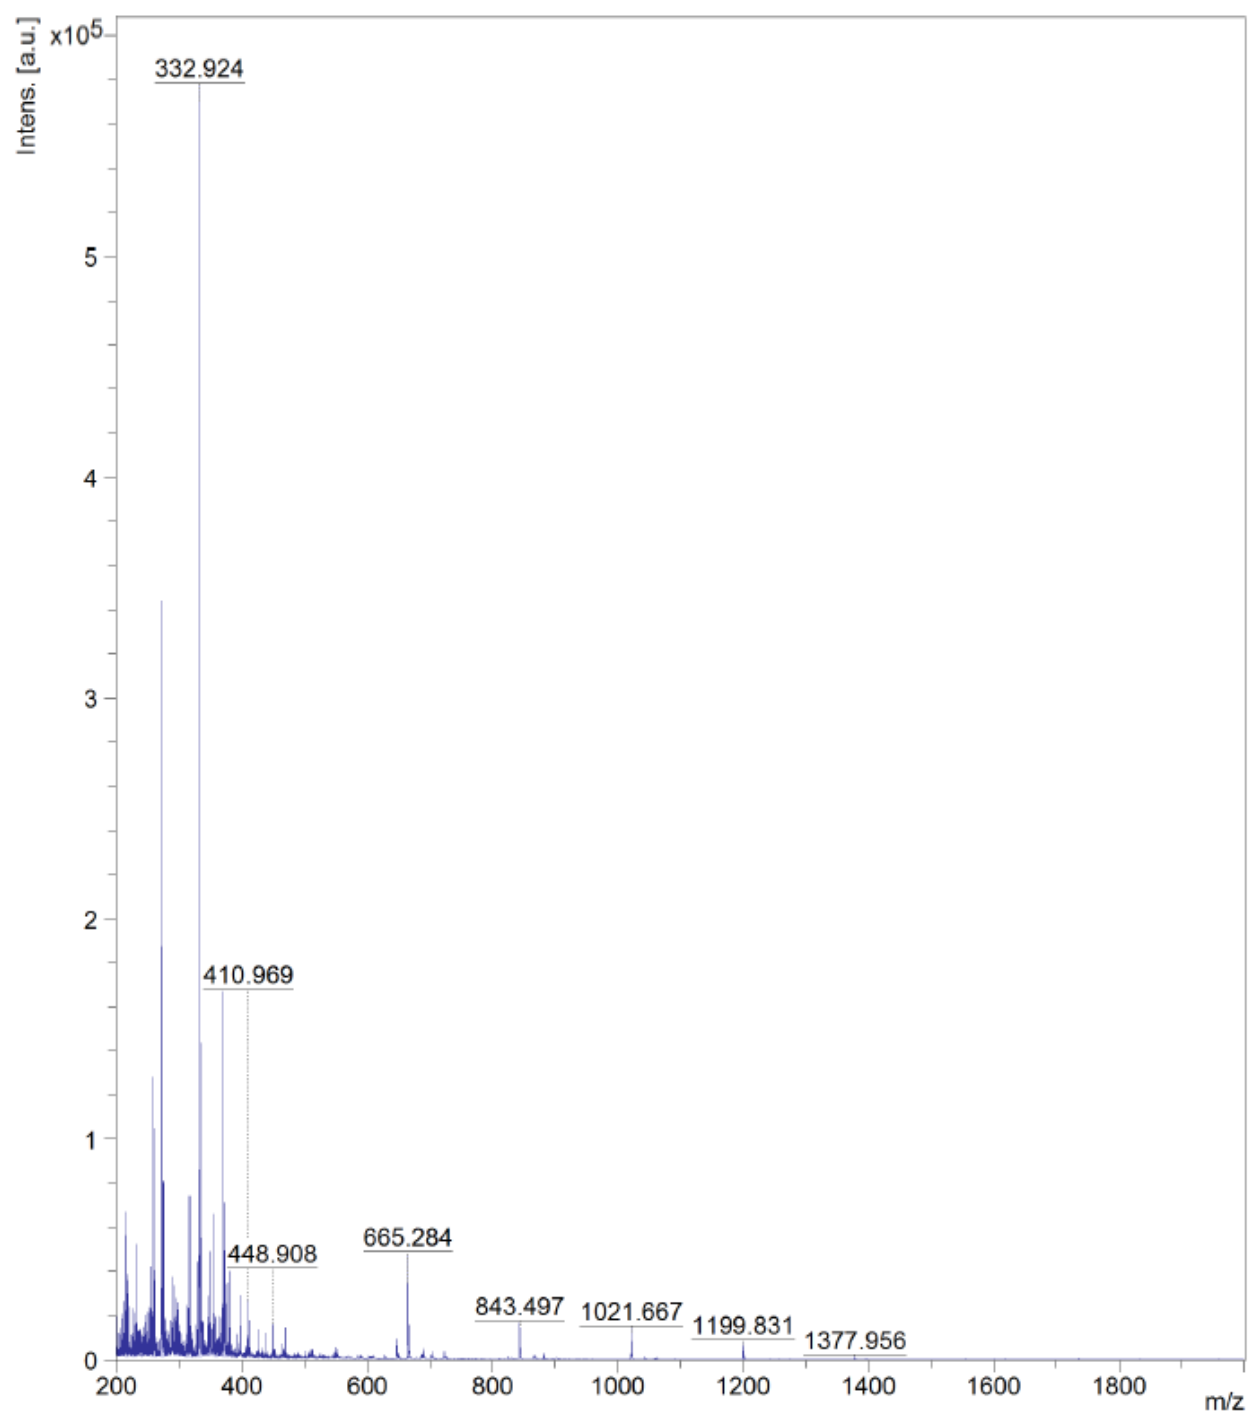

Figure S24. The MALDI-TOF-MS spectrum of the 2,3-dibromo-2-propen-1-ol oligomer obtained using [VO(ODA)bipy] • 2 H<sub>2</sub>O.

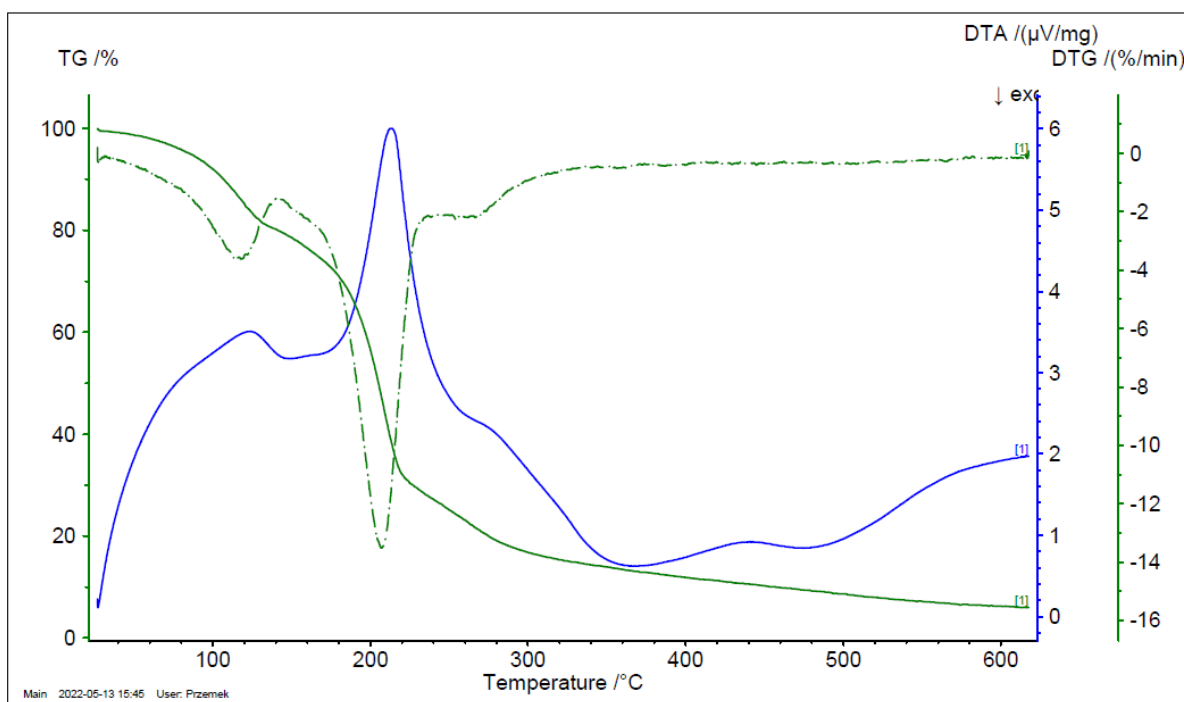

Figure S25. The TG spectrum of the 3-buten-2-ol oligomer obtained using  $[\text{VO}(\text{TDA})\text{phen}] \cdot 1.5 \text{ H}_2\text{O}$ .

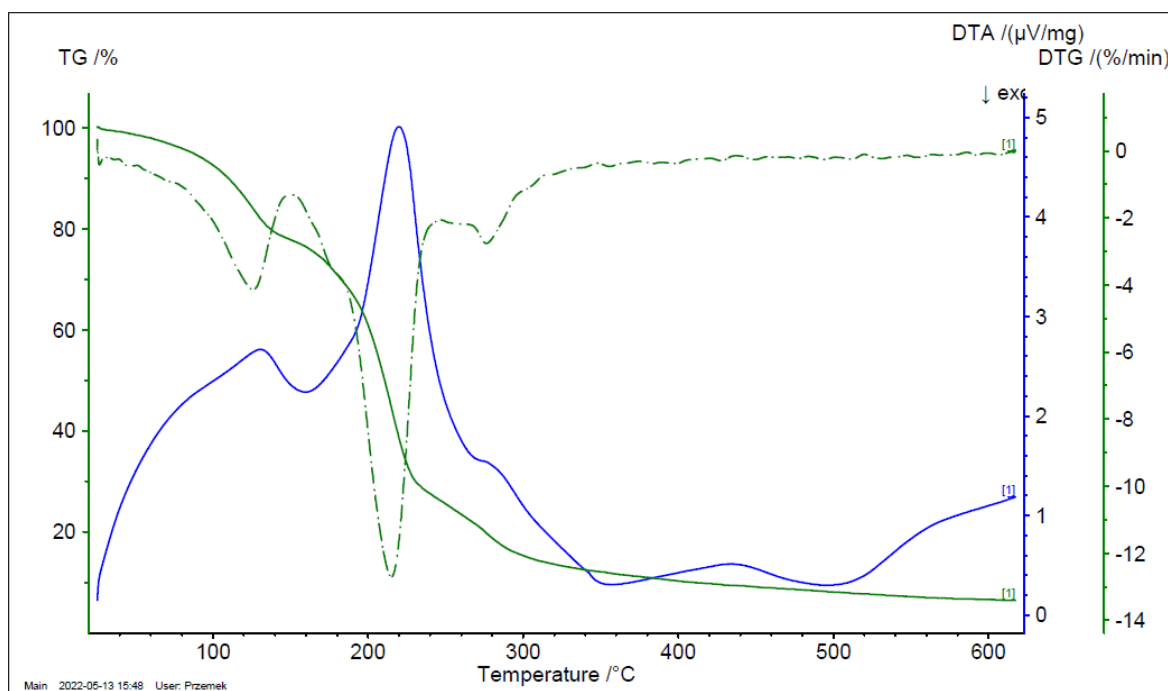

Figure S26. The TG spectrum of the allyl alcohol oligomer obtained using  $[\text{VO}(\text{TDA})\text{phen}] \cdot 1.5 \text{ H}_2\text{O}$ .

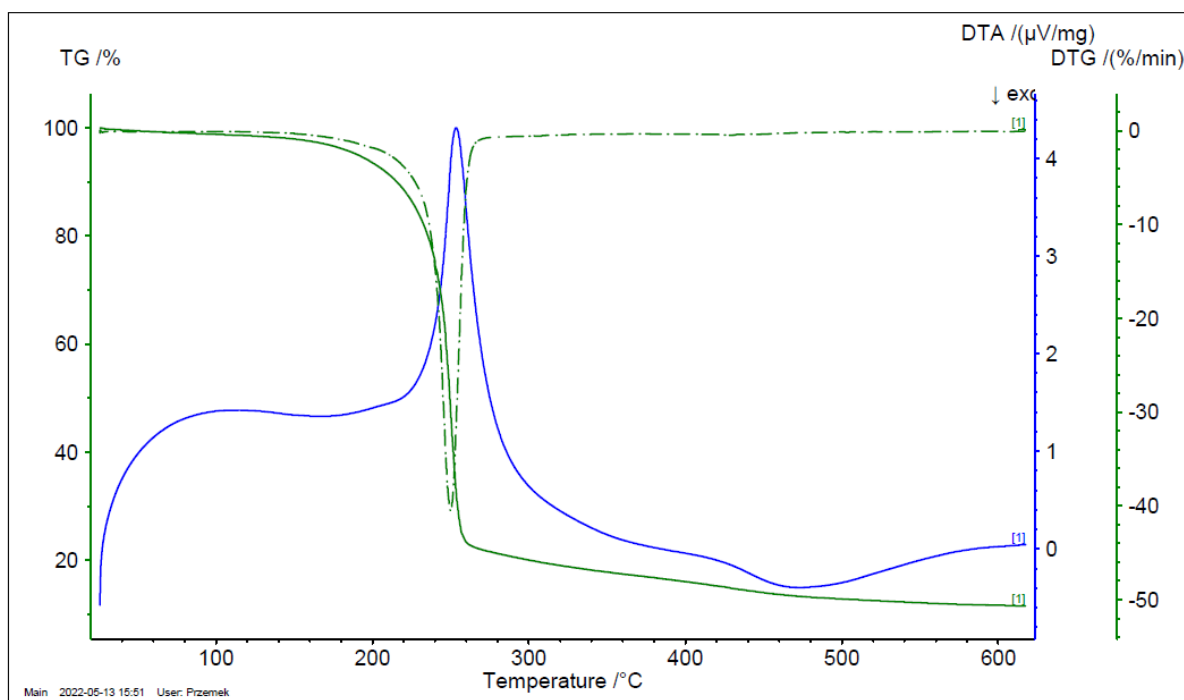

Figure S27. The TG spectrum of the 2,3-dibromo-2-propen-1-ol oligomer obtained using  $[\text{VO}(\text{TDA})\text{phen}] \cdot 1.5 \text{ H}_2\text{O}$ .

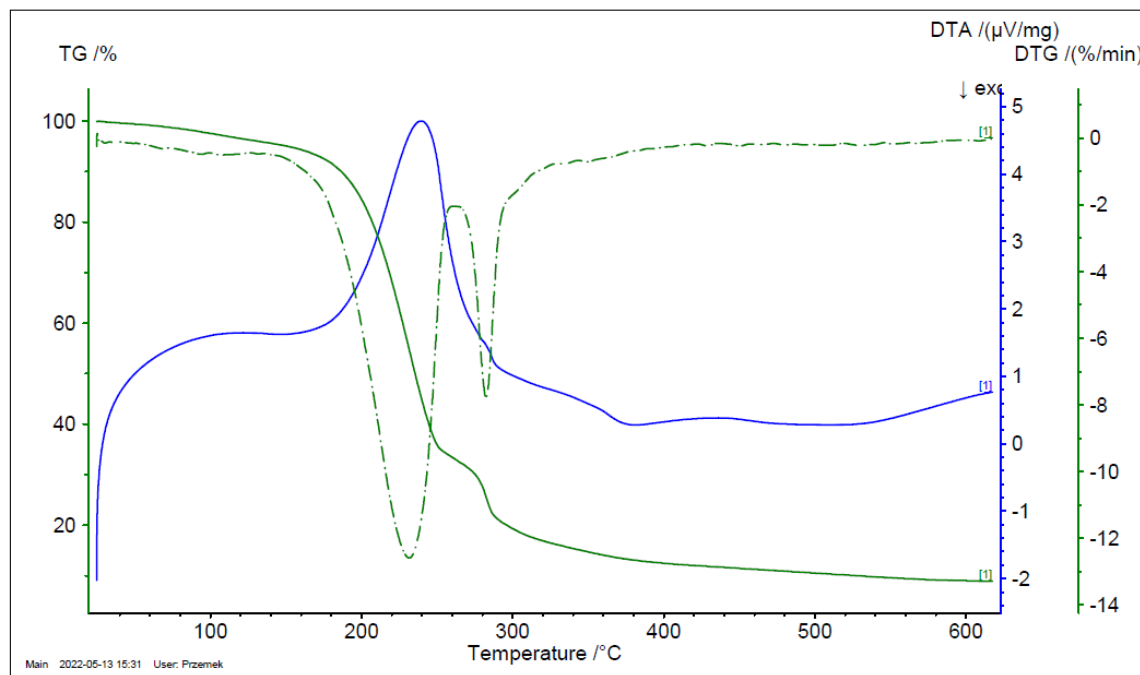

Figure S28. The TG spectrum of the 3-buten-2-ol oligomer obtained using  $[\text{VOO}(\text{dipic})(2\text{-phepyH})] \cdot \text{H}_2\text{O}$ .

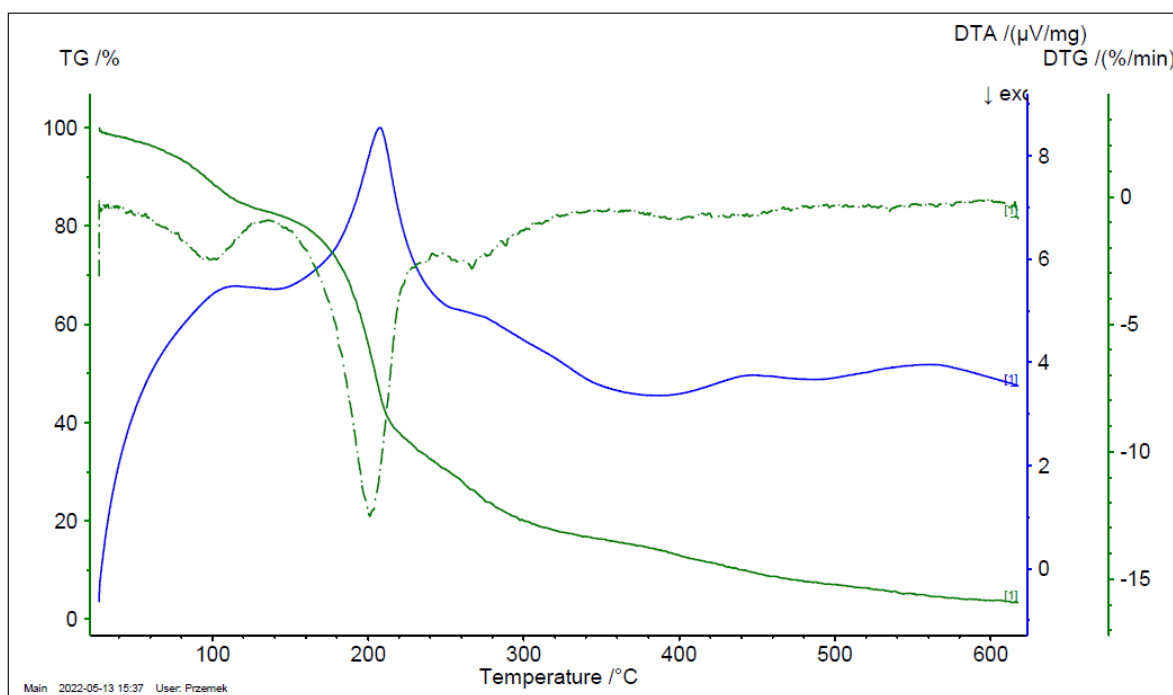

Figure S29. The TG spectrum of the allyl alcohol oligomer obtained using  $[\text{VOO}(\text{dipic})(2\text{-phepyH})] \cdot \text{H}_2\text{O}$ .

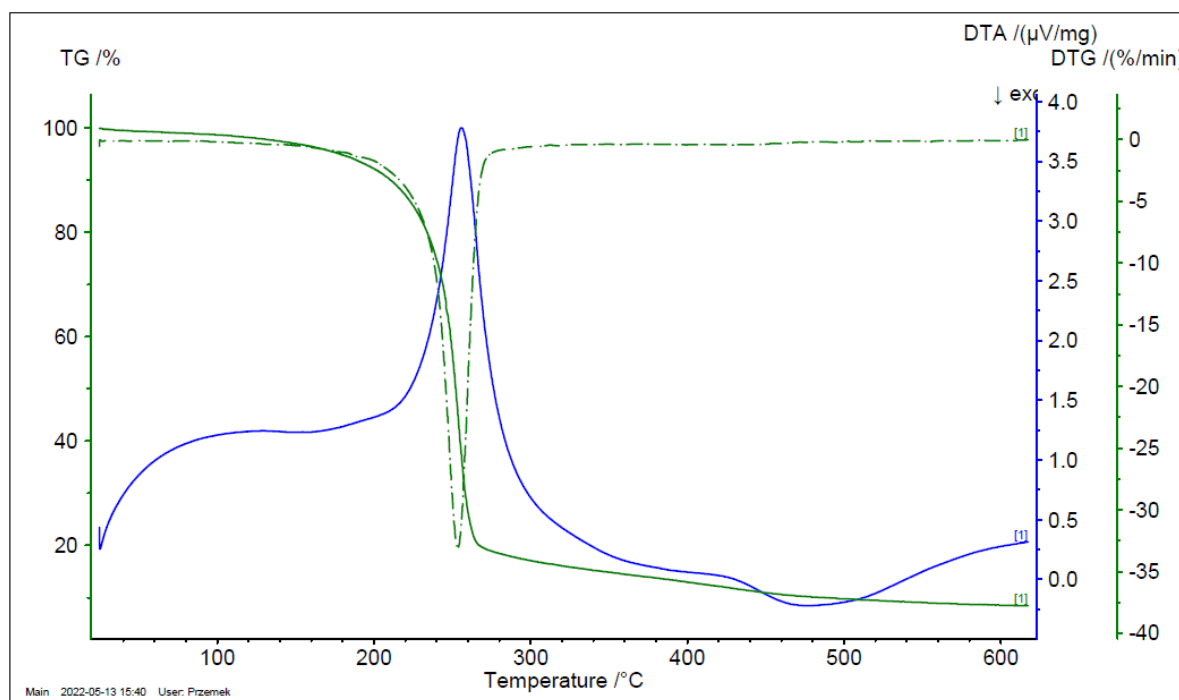

Figure S30 The TG spectrum of the 2,3-dibromo-2-propen-1-ol oligomer obtained using  $[\text{VOO}(\text{dipic})(2\text{-phepyH})] \cdot \text{H}_2\text{O}$ .

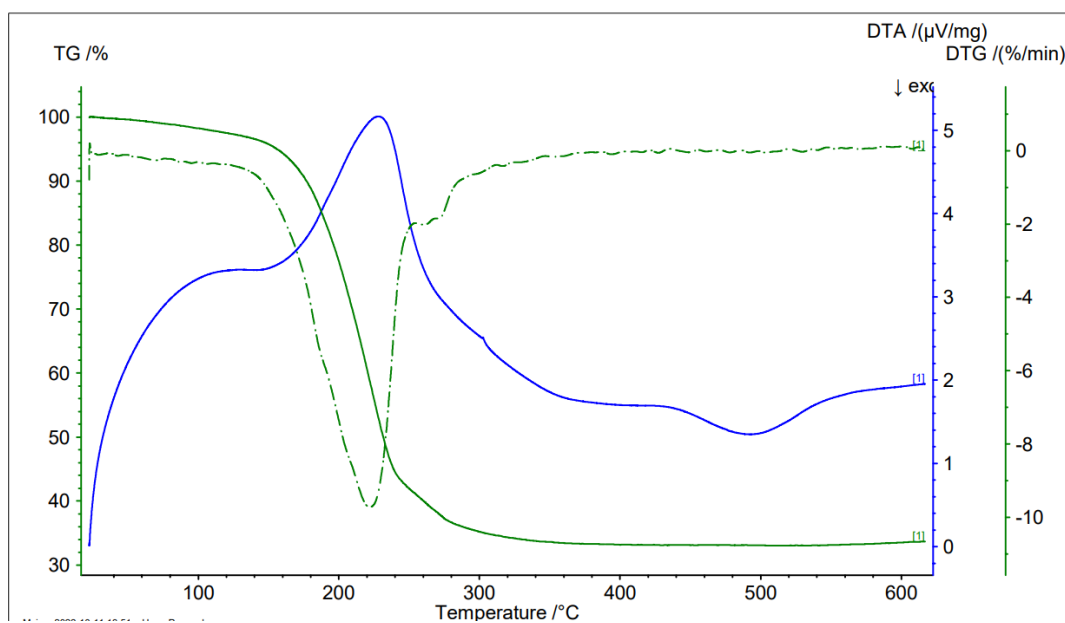

Figure S31. The TG spectrum of the 3-buten-2-ol oligomer obtained using  $[\text{VO}(\text{dipic})(\text{dmbipy})] \cdot 2 \text{H}_2\text{O}$

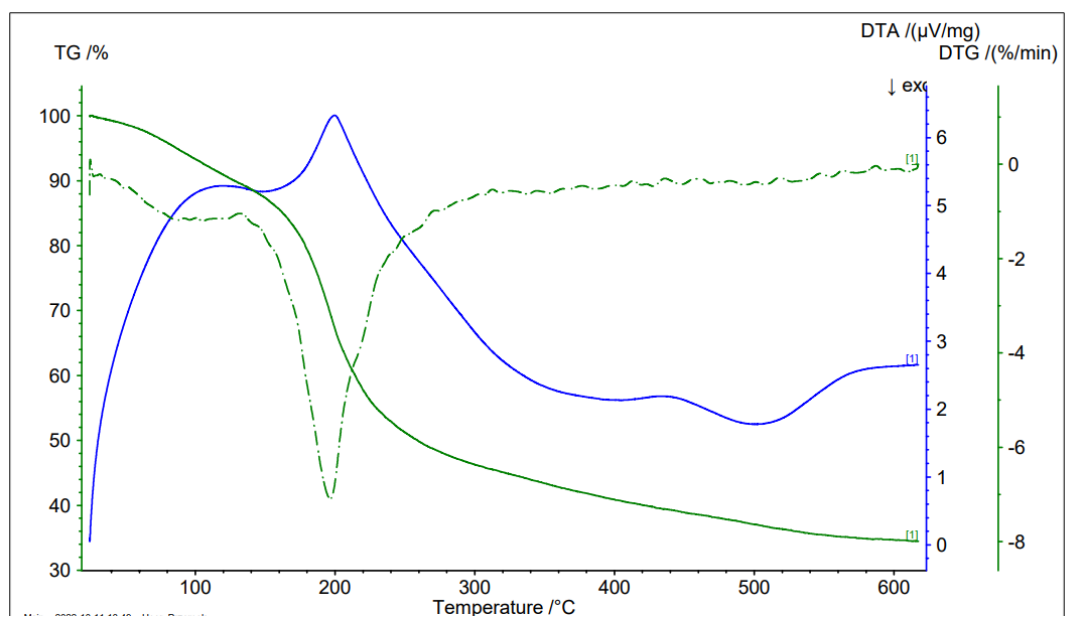

Figure S32. The TG spectrum of the allyl alcohol oligomer obtained using  $[\text{VO}(\text{dipic})(\text{dmbipy})] \cdot 2 \text{H}_2\text{O}$

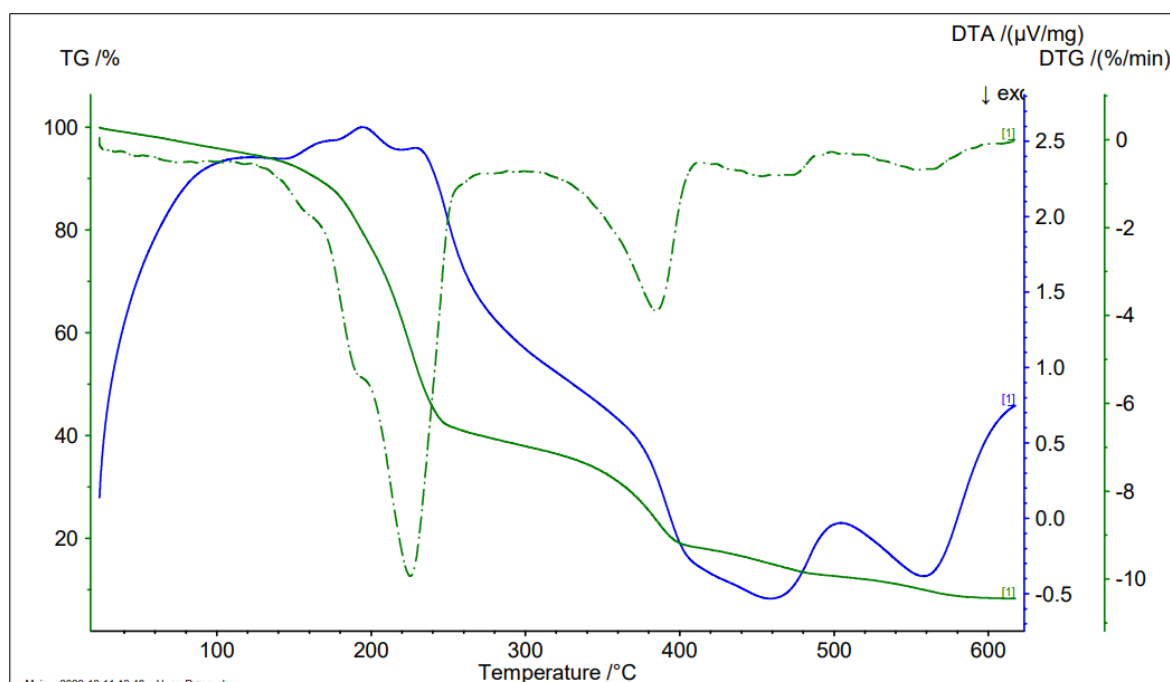

Figure S33. The TG spectrum of the 2,3-dibromo-2-propen-1-ol oligomer obtained using  $[\text{VO}(\text{dipic})(\text{dmbipy})] \cdot 2 \text{H}_2\text{O}$

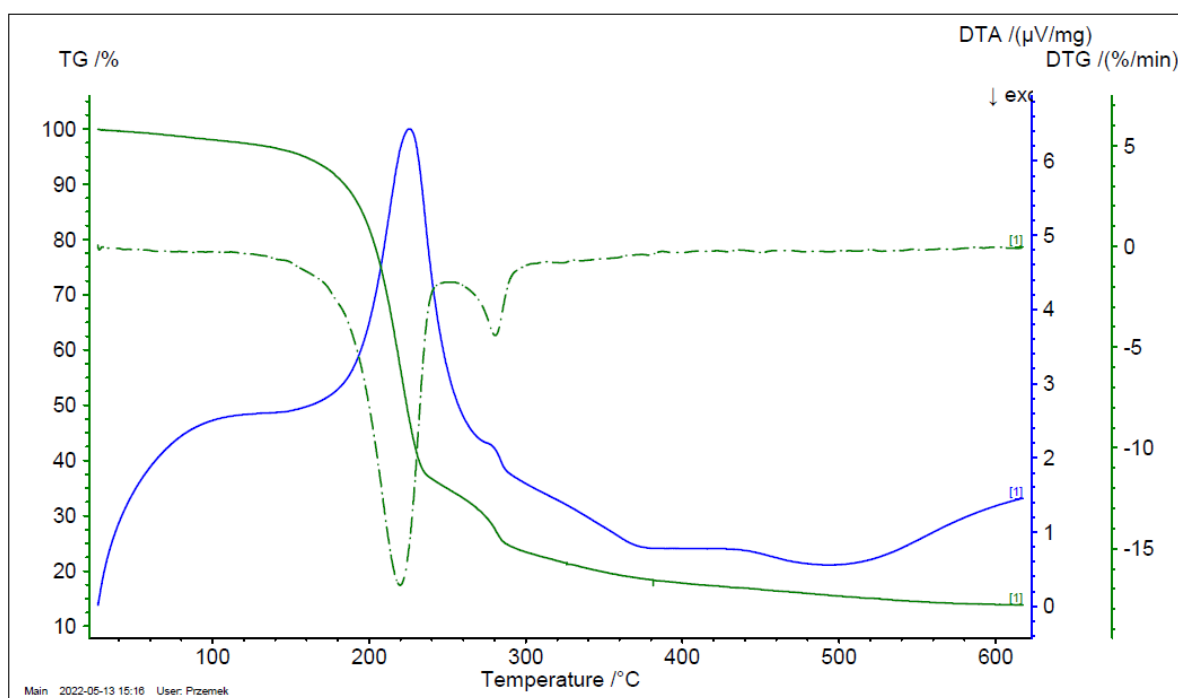

Figure S34. The TG spectrum of the 3-buten-2-ol oligomer obtained using  $[\text{VO}(\text{ODA})\text{bipy}] \cdot 2 \text{H}_2\text{O}$

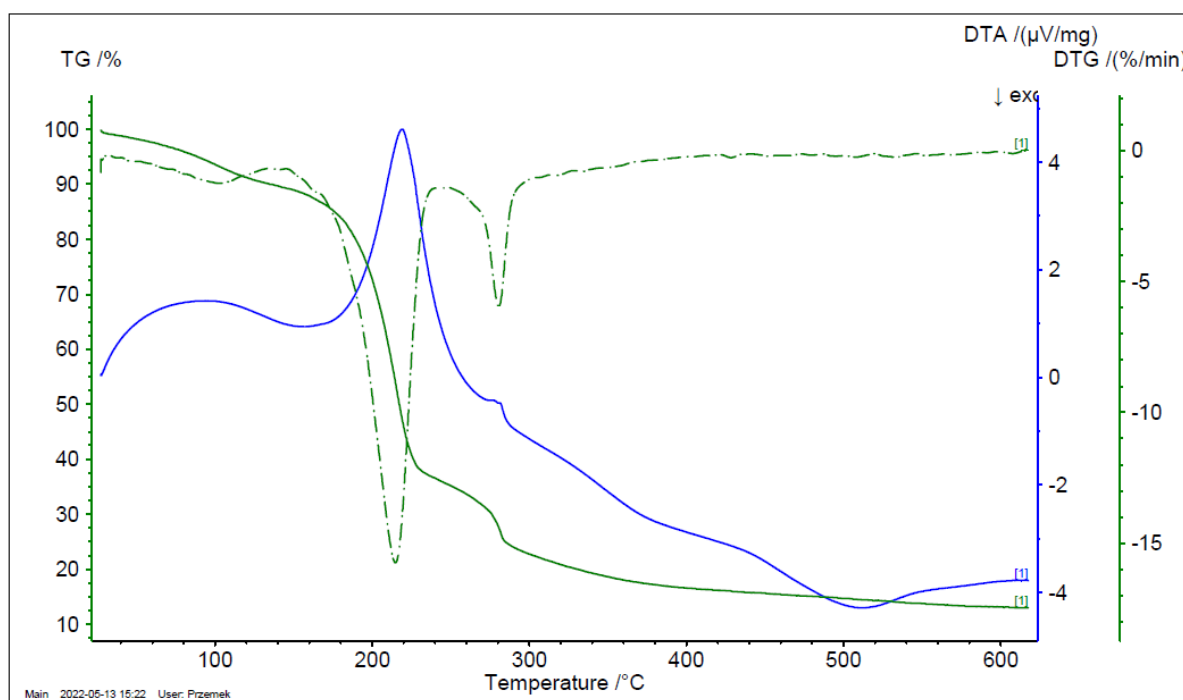

Figure S35. The TG spectrum of the allyl alcohol oligomer obtained using  $[\text{VO}(\text{ODA})\text{bipy}] \cdot 2 \text{H}_2\text{O}$

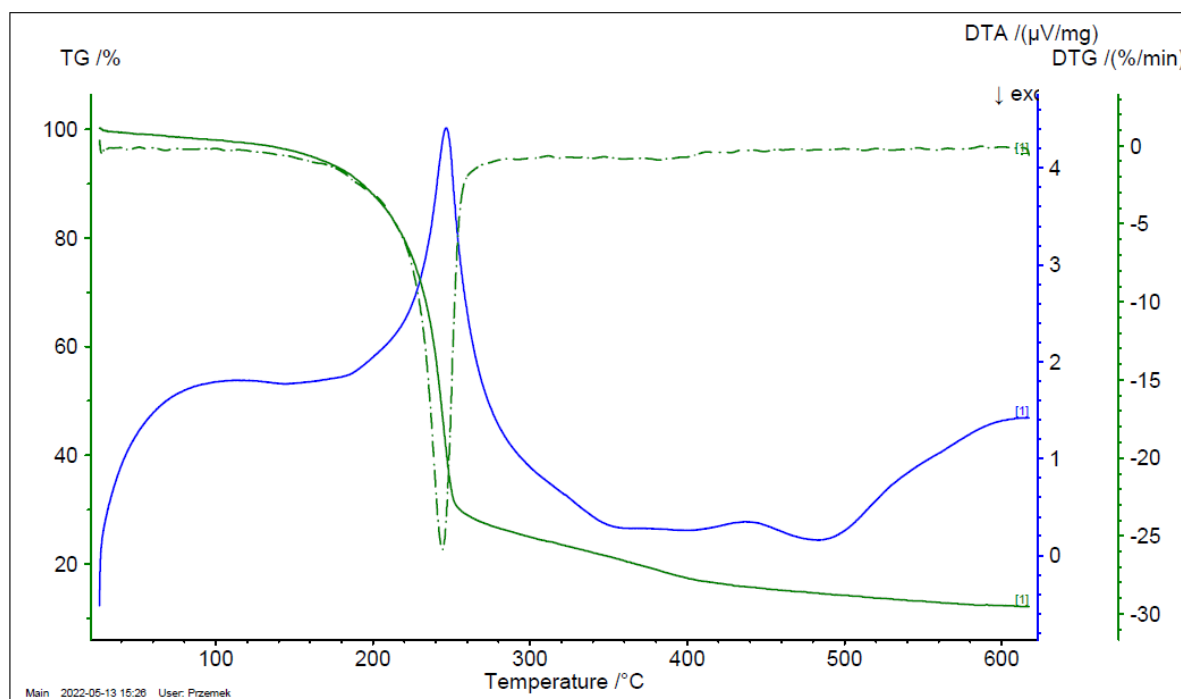

Figure S36. The TG spectrum of the 2,3-dibromo-2-propen-1-ol oligomer obtained using  $[\text{VO}(\text{ODA})\text{bipy}] \cdot 2 \text{H}_2\text{O}$

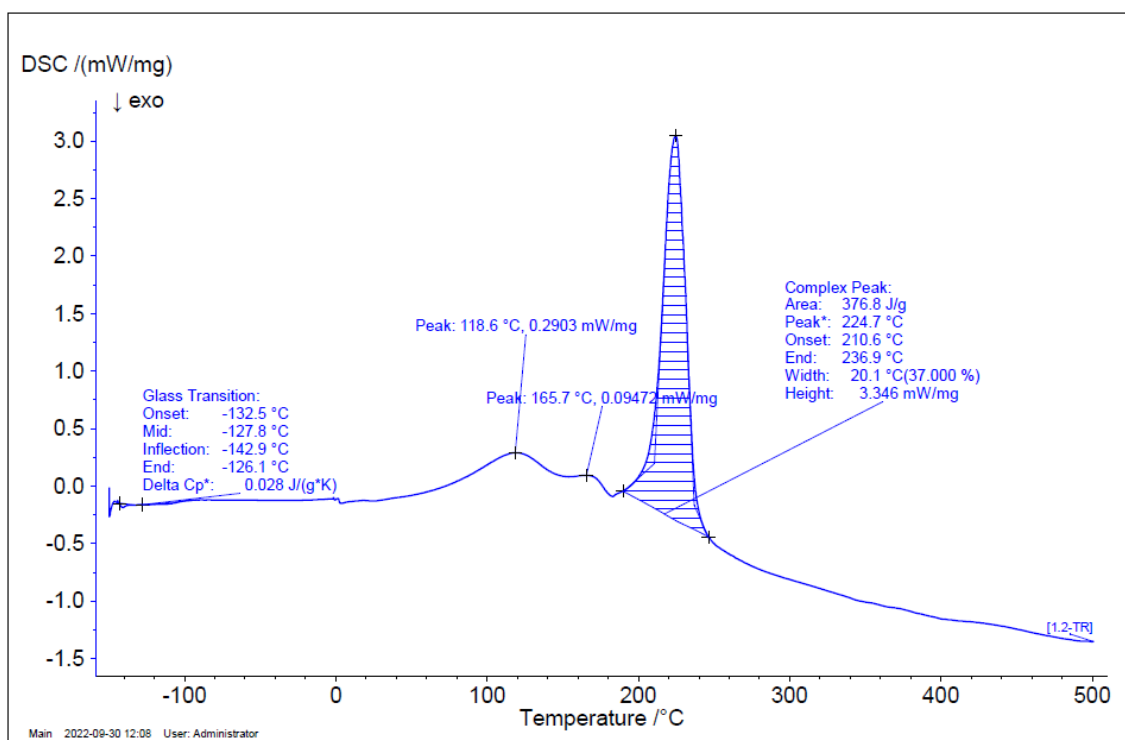

Figure S37. The DSC spectrum of the 3-buten-2-ol oligomer obtained using  $[\text{VO}(\text{TDA})(\text{phen})] \cdot 1.5 \text{H}_2\text{O}$ .

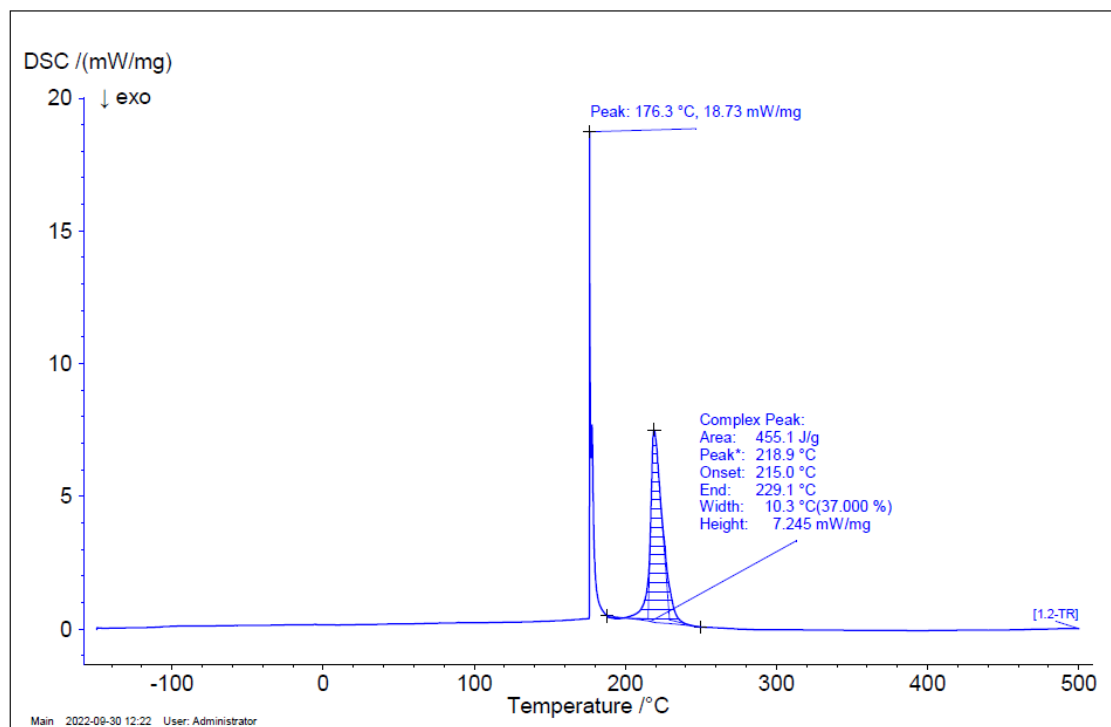

Figure S38. The DSC spectrum of the allyl alcohol oligomer obtained using  $[\text{VO}(\text{TDA})(\text{phen})] \cdot 1.5 \text{H}_2\text{O}$ .

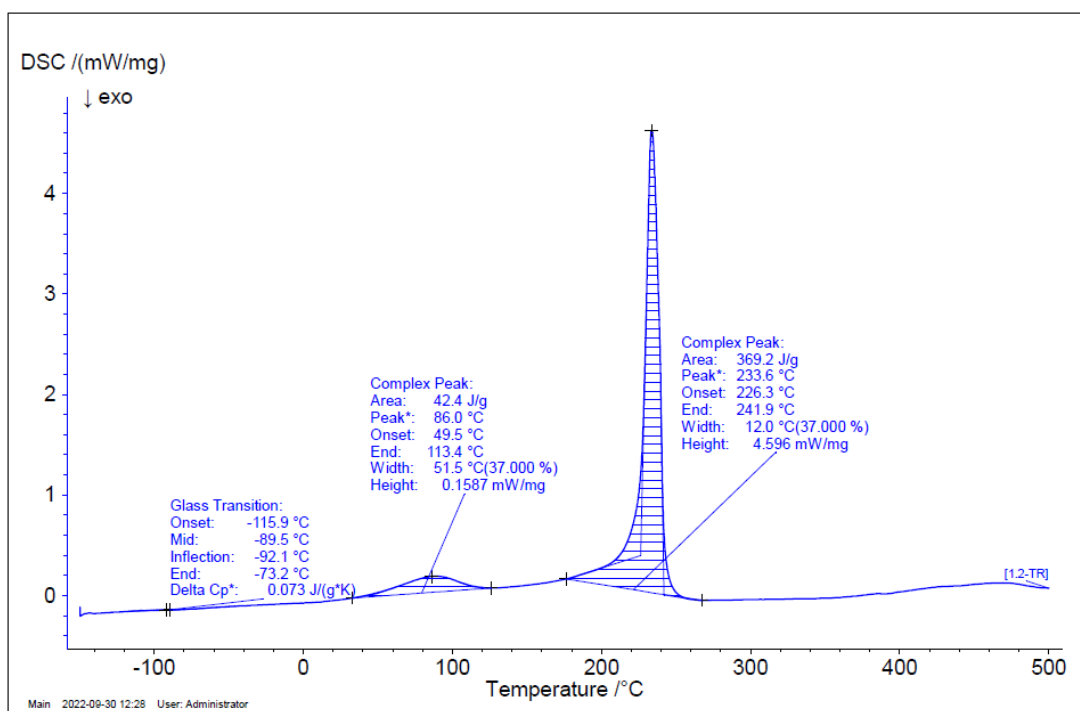

Figure S39. The DSC spectrum of the 2,3-dibromo-2-propen-1-ol oligomer obtained using  $[\text{VO}(\text{TDA})(\text{phen})] \cdot 1.5 \text{ H}_2\text{O}$ .

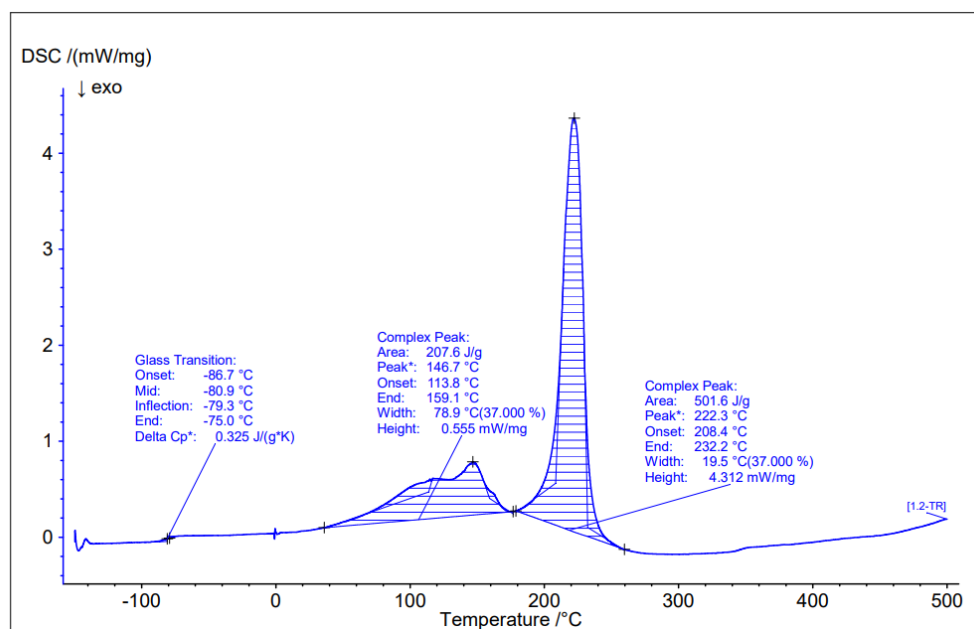

Figure S40. The DSC spectrum of the 3-buten-2-ol oligomer obtained using  $[\text{VOO}(\text{dipic})(2\text{-phepyH})] \cdot \text{H}_2\text{O}$ .

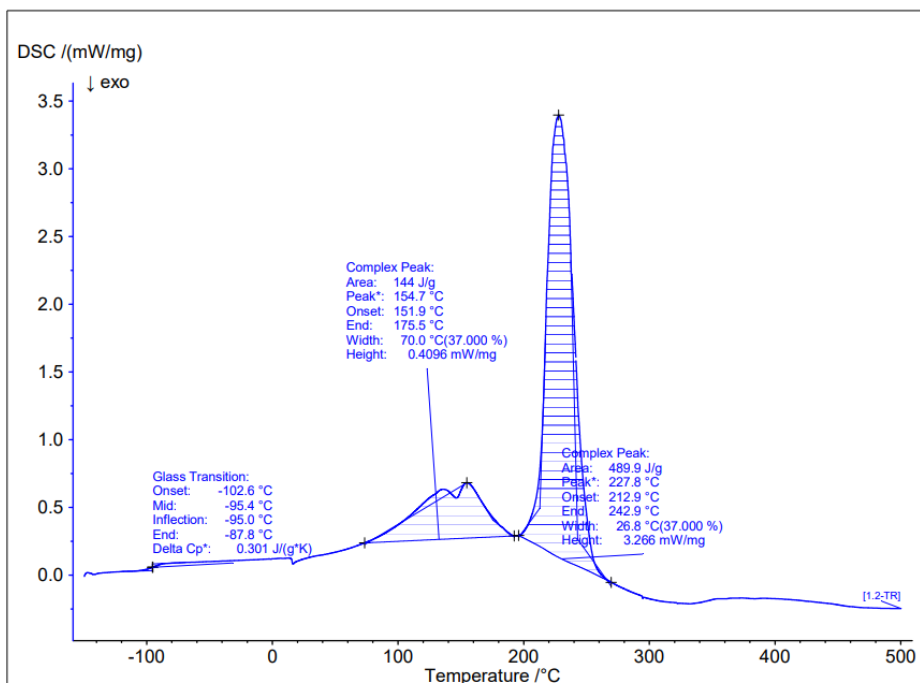

Figure S41. The DSC spectrum of the allyl alcohol oligomer obtained using [VOO(dipic)(2-phepyH)] • H<sub>2</sub>O.

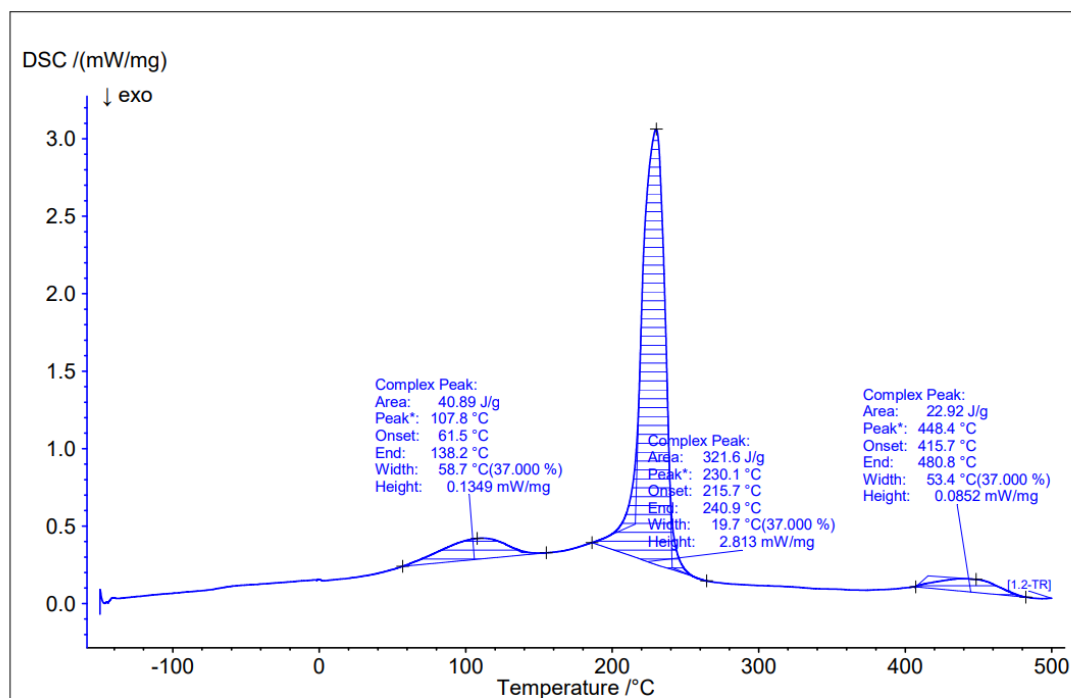

Figure S42. The DSC spectrum of the 2,3-dibromo-2-propen-1-ol oligomer obtained using [VOO(dipic)(2-phepyH)] • H<sub>2</sub>O.

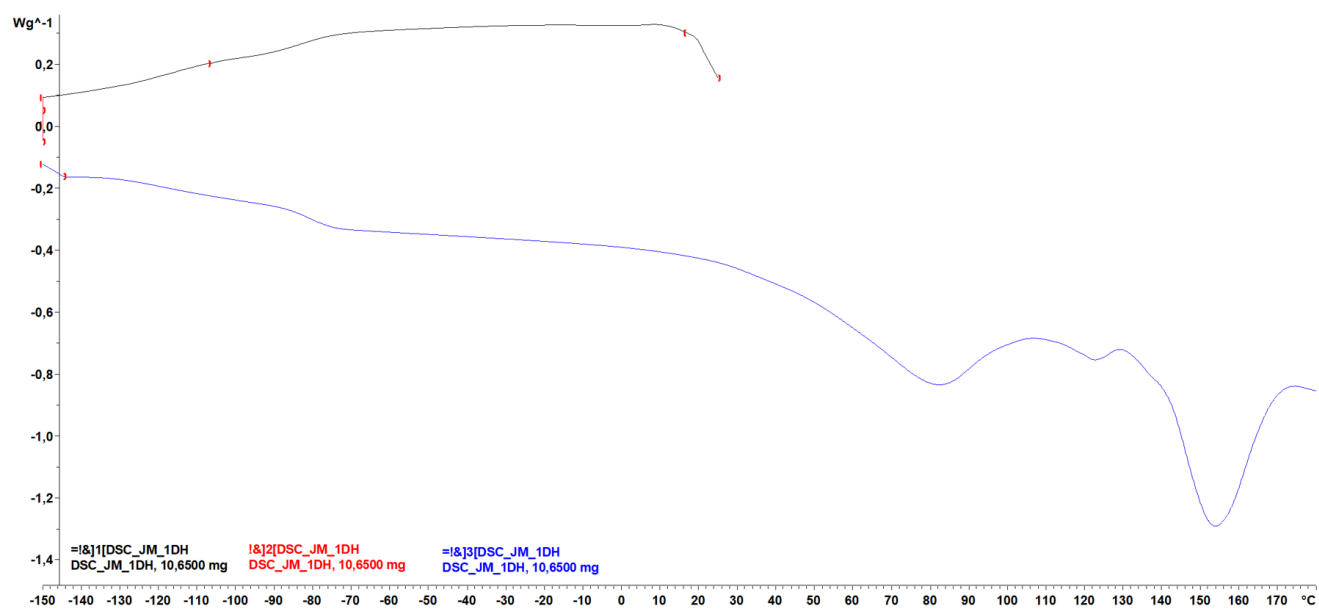

Figure S43. The DSC spectrum of the 3-buten-2ol oligomer obtained using [VO(dipic)(dmbipy)] • 2 H<sub>2</sub>O.

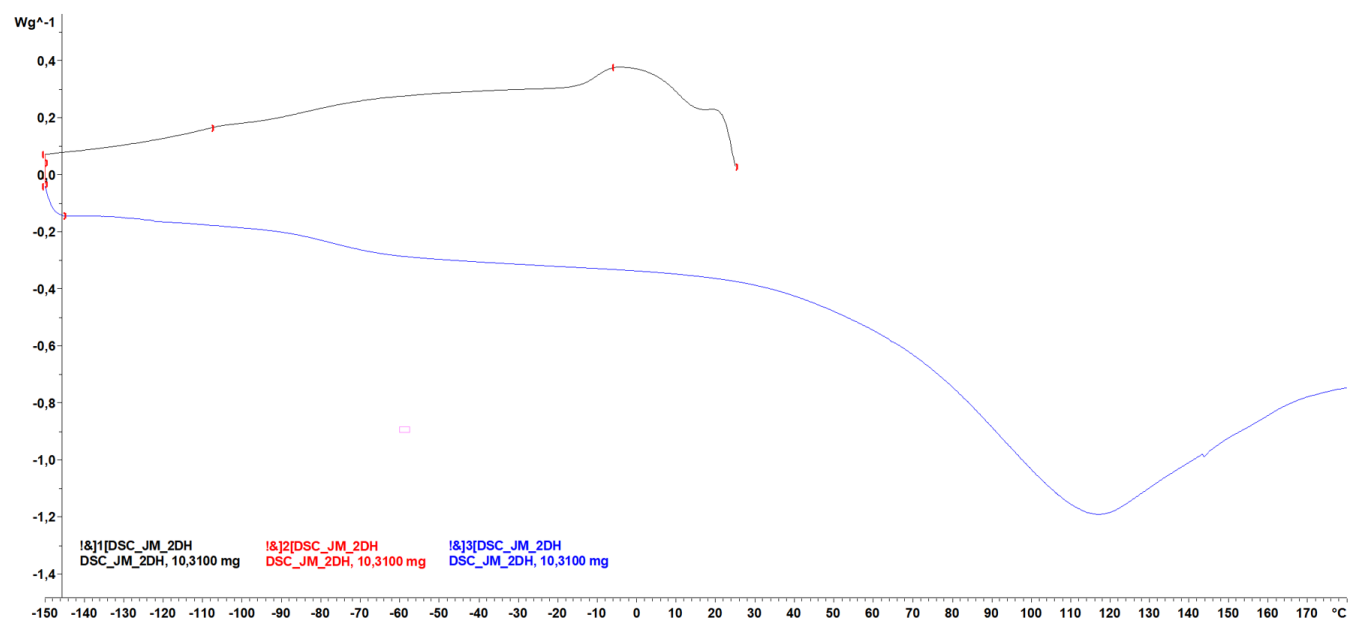

Figure S44. The DSC spectrum of the allyl alcohol oligomer obtained using [VO(dipic)(dmbipy)] • 2 H<sub>2</sub>O.

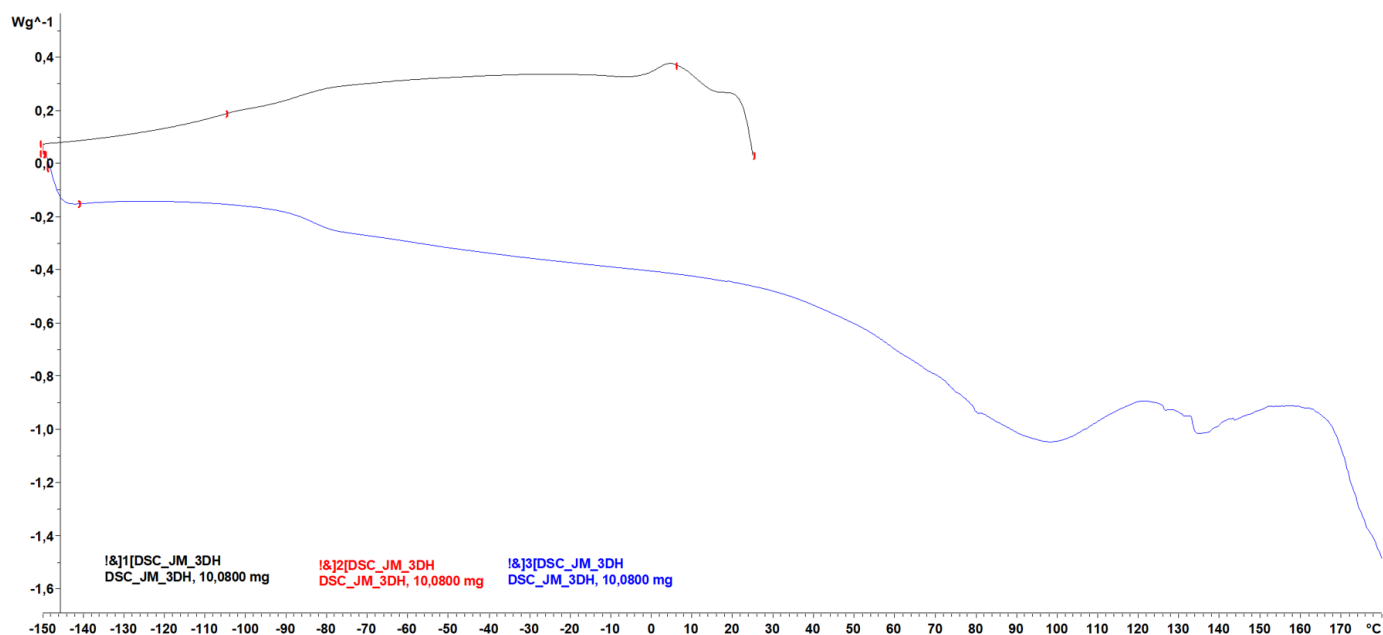

Figure S45. The DSC spectrum of the 2,3-dibromo-2-propen-1-ol oligomer obtained using [VO(dipic)(dmbipy)] • 2 H<sub>2</sub>O.

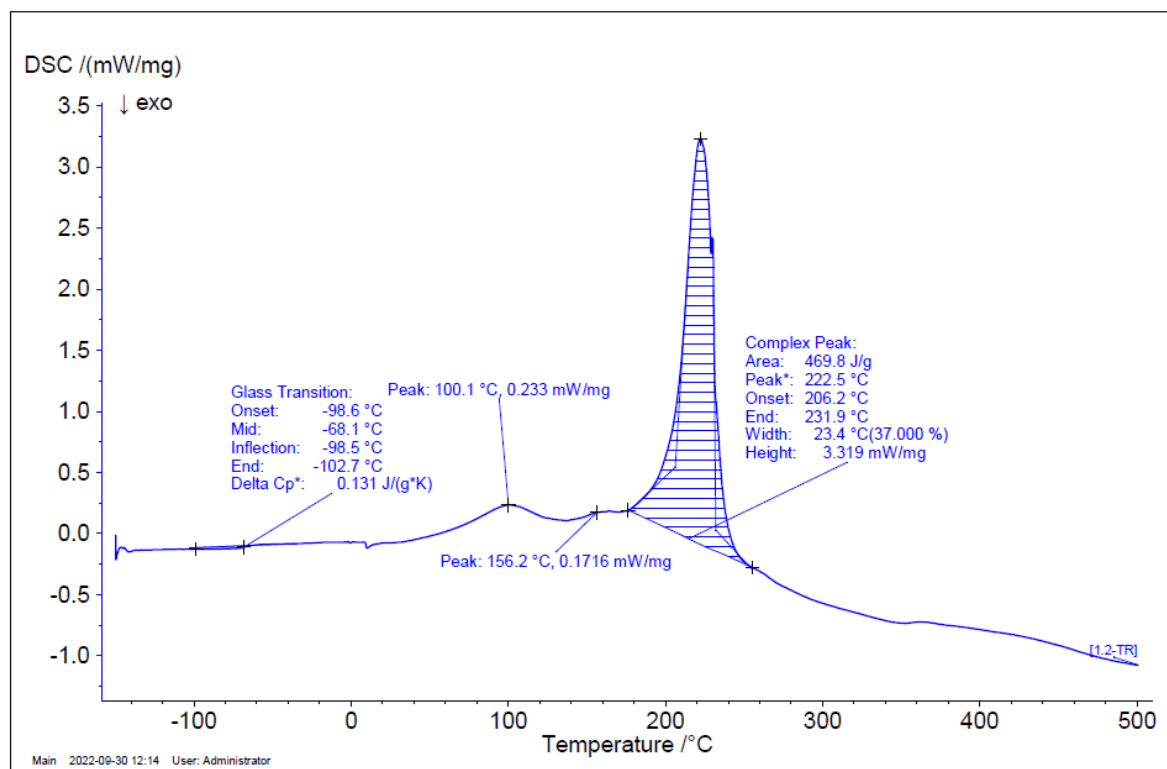

Figure S46. The DSC spectrum of the 3-buten-2-ol oligomer obtained using [VO(ODA)bipy] • 2 H<sub>2</sub>O.

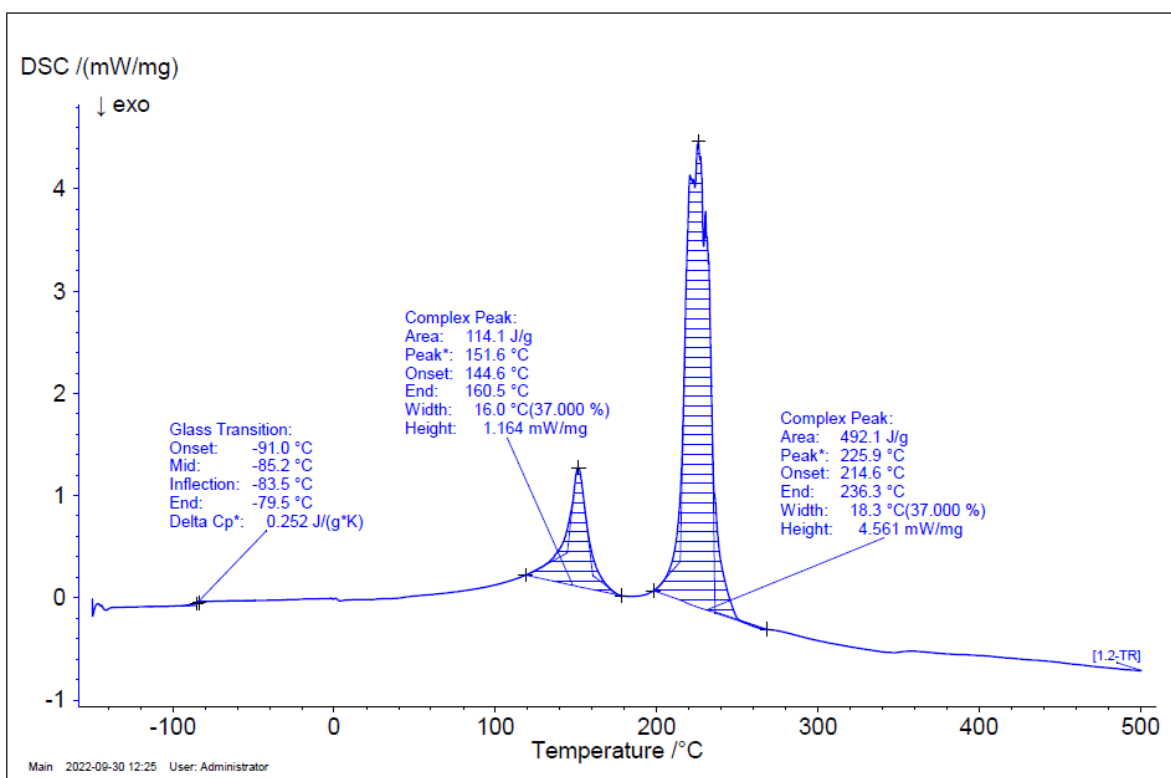

Figure S47. The DSC spectrum of the allyl alcohol oligomer obtained using [VO(ODA)bipy] • 2 H<sub>2</sub>O.

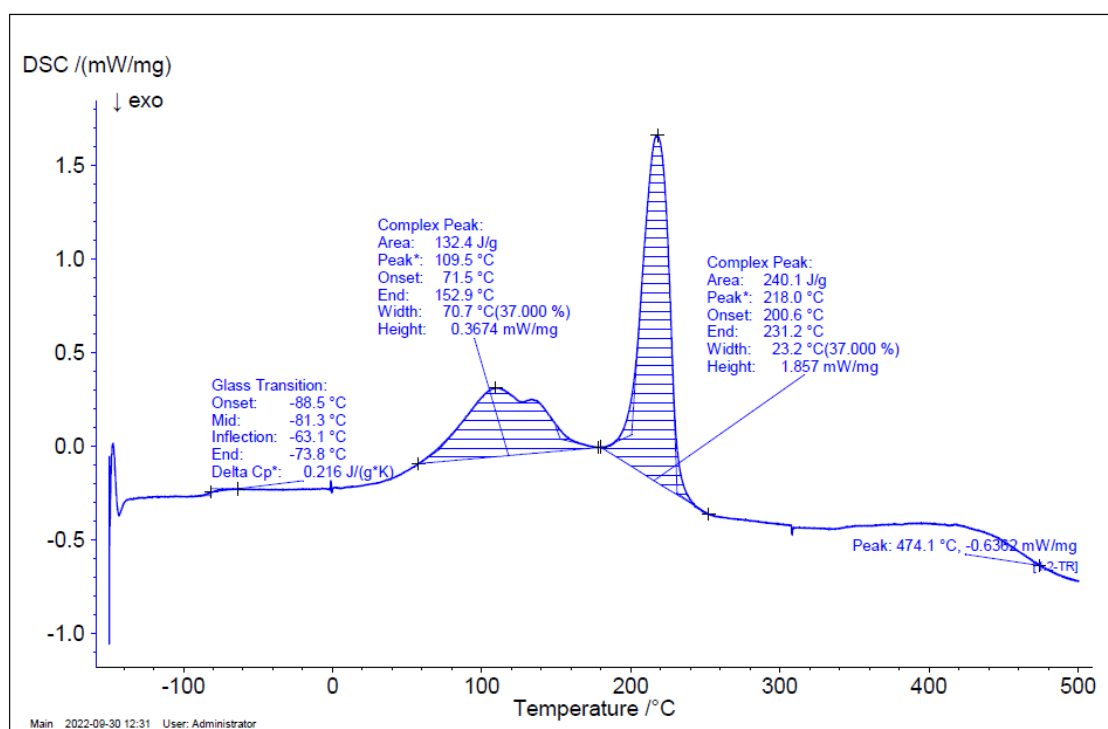

Figure S48. The DSC spectrum of the 2,3-dibromo-2-propen-1-ol oligomer obtained using [VO(ODA)bipy] • 2 H<sub>2</sub>O.
